# Supplementary material
Source: MDPI journal article supplement (https://www.mdpi.com/2073-4344/12/10/1131)

---

## Supplementary Materials

### Contents:

**S1.** Representative FT-IR spectra for sPIR samples from complexes **1-**, **3-NH-BARF** catalyst system polymerization runs 4-19 in **Table 1.** ..... **2**

**S2.** Representative C-13 NMR spectra for sPIR samples from complexes **1-**, **3-NH-BARF** catalyst system, polymerization runs 4-19 in **Table 1.** ..... **7**

**S3.** Representative GPC plots for sPIR samples from complexes **1-**, **3-NH-BARF** catalyst system, polymerization runs 4-19 in **Table 1.** ..... **12**

**S4.** Representative DSC diagrams for sPIR samples from complexes **1-**, **3-NH-BARF** catalyst system, polymerization runs 5 and 18 in **Table 1.** ..... **20**

**S5.** Representative C-13 NMR spectra for sPIR samples from complexes **1-**, **2**, **3-MMAO3A** catalyst system, polymerization runs in **Table 2.** ..... **21**

**S6.** Representative GPC plots for sPIR samples from complexes **1-**, **23-MMAO3A** catalyst system, polymerization runs in **Table 2.** ■ **26**

**S1.** Representative FT-IR spectra for sPIR samples from complexes **1-**, **3-PDMNH-BARF** catalyst system polymerization runs 4–19 in **Table 1**.

**Table 1. Run-4**

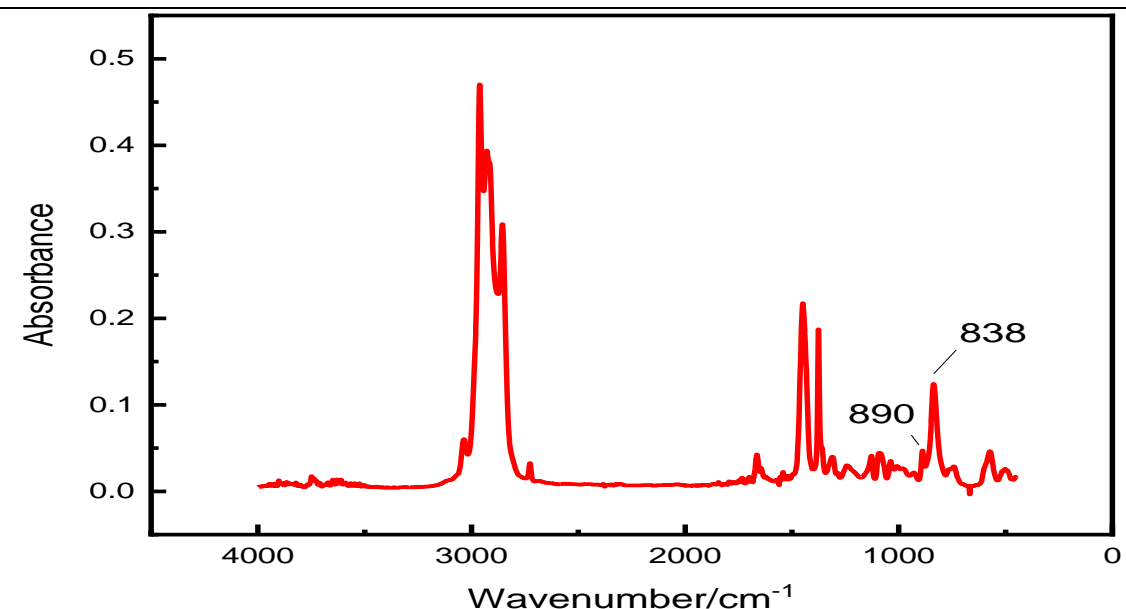

**Table 1. Run-5**

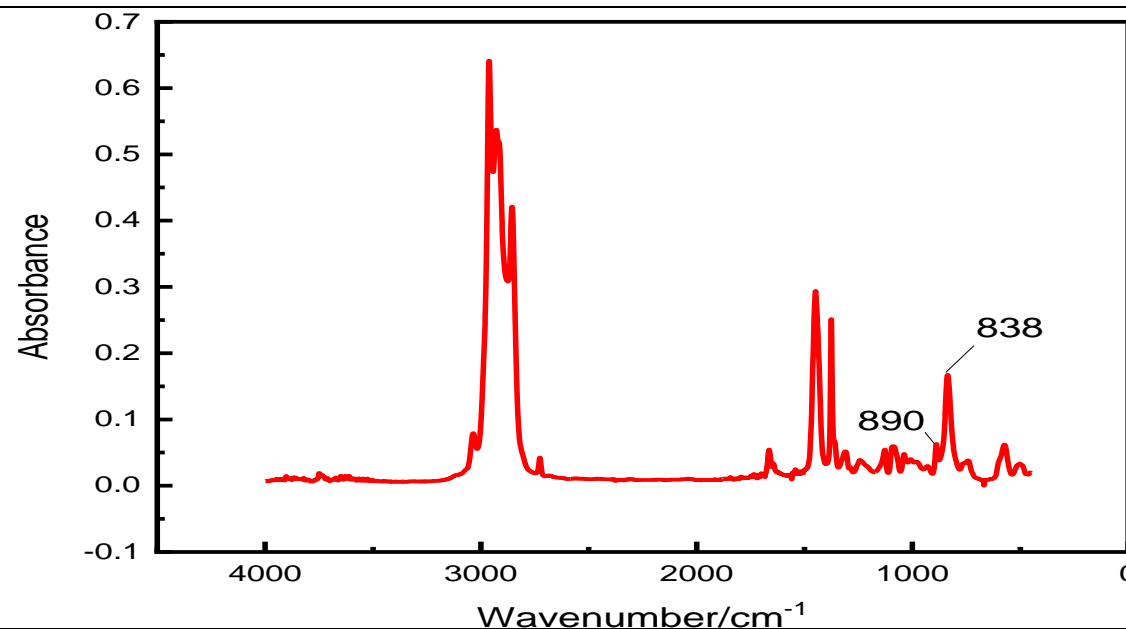

Table 1. Run-6

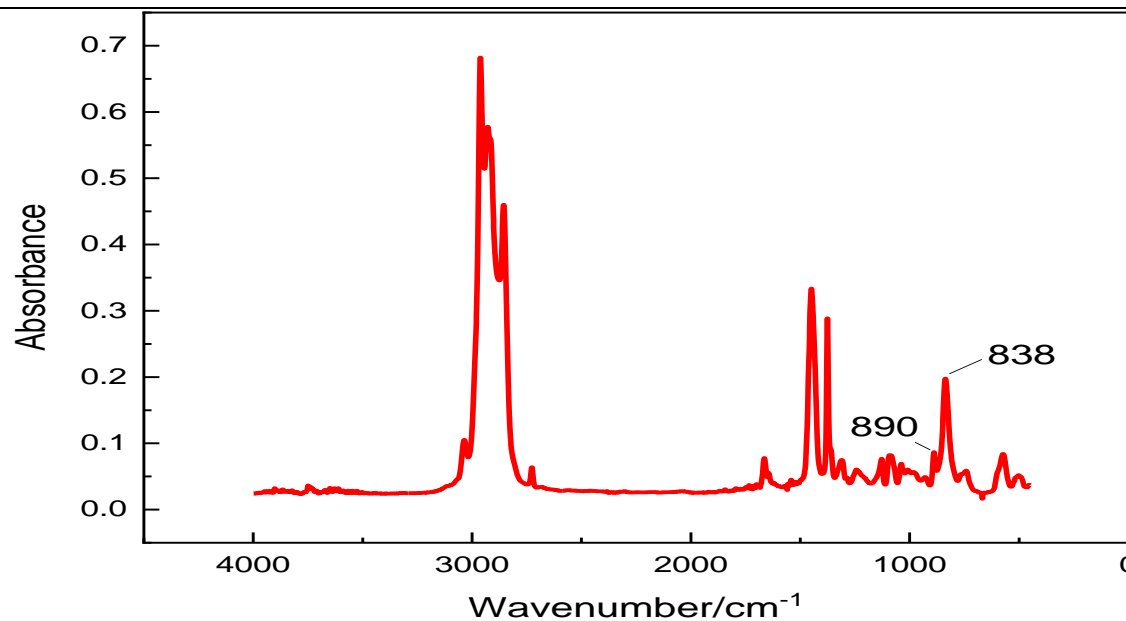

Table 1. Run-7

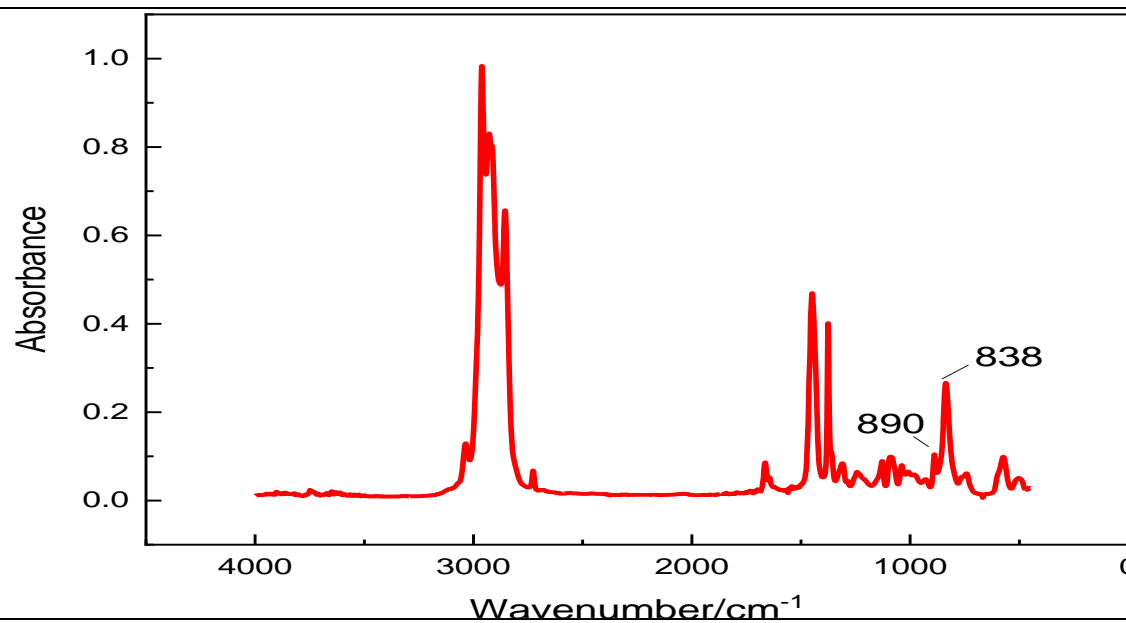

Table 1. Run-8

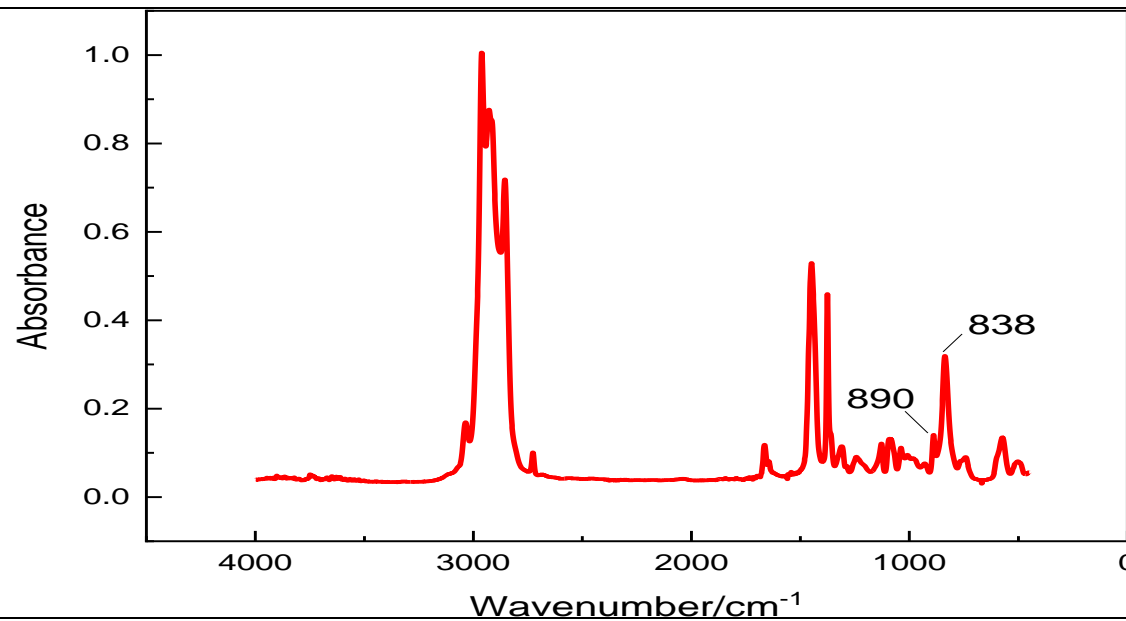

Table 1. Run-9

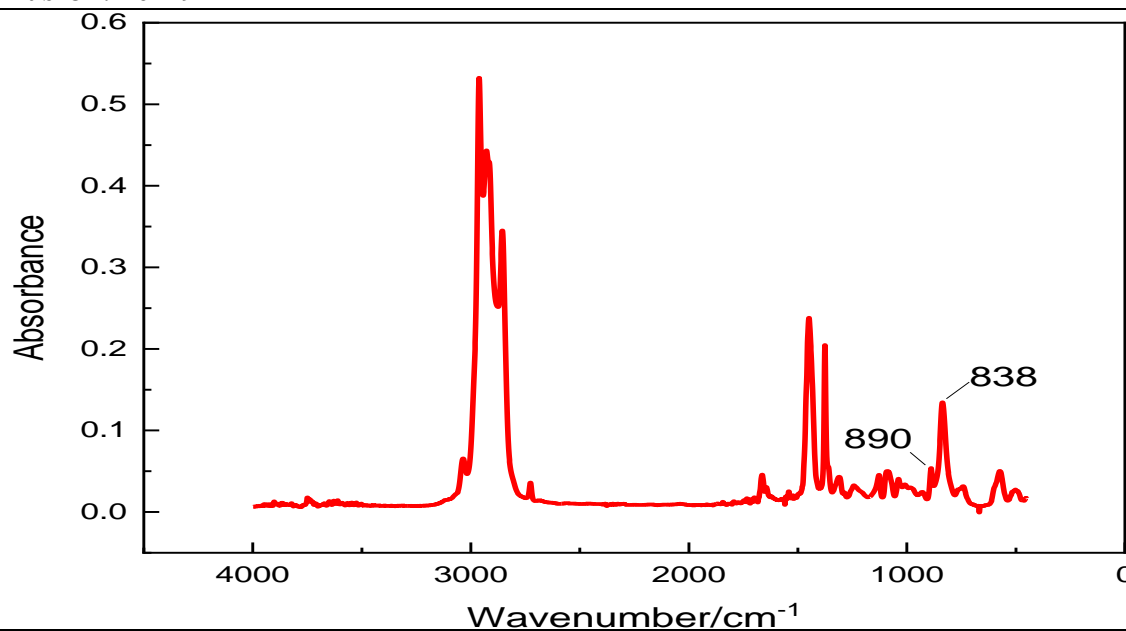

Table 1. Run-10

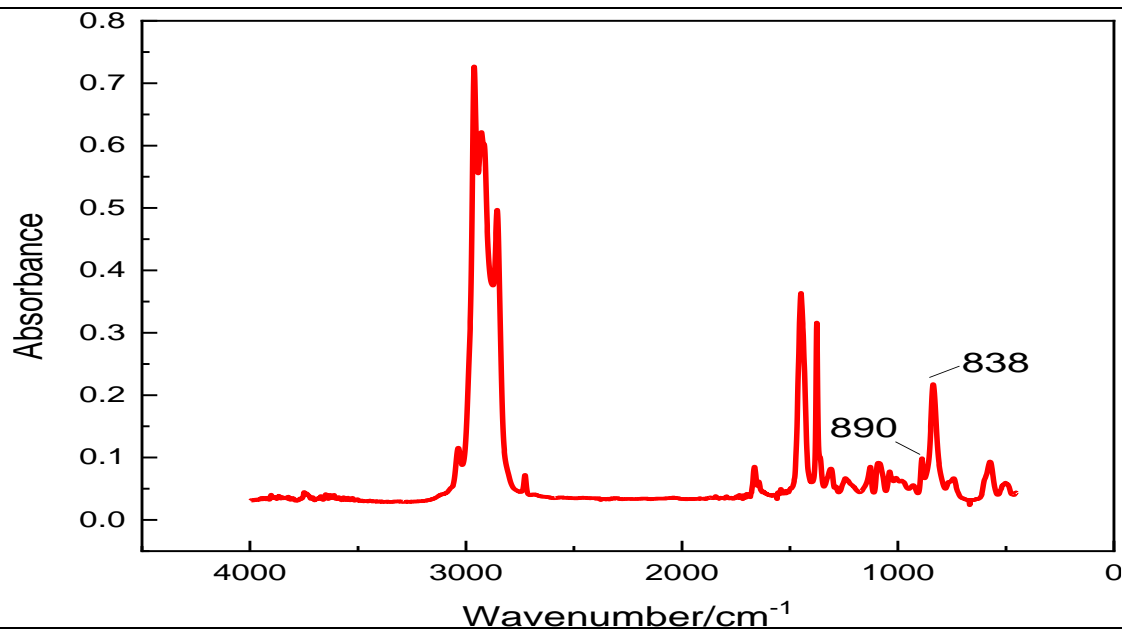

Table 1. Run-11

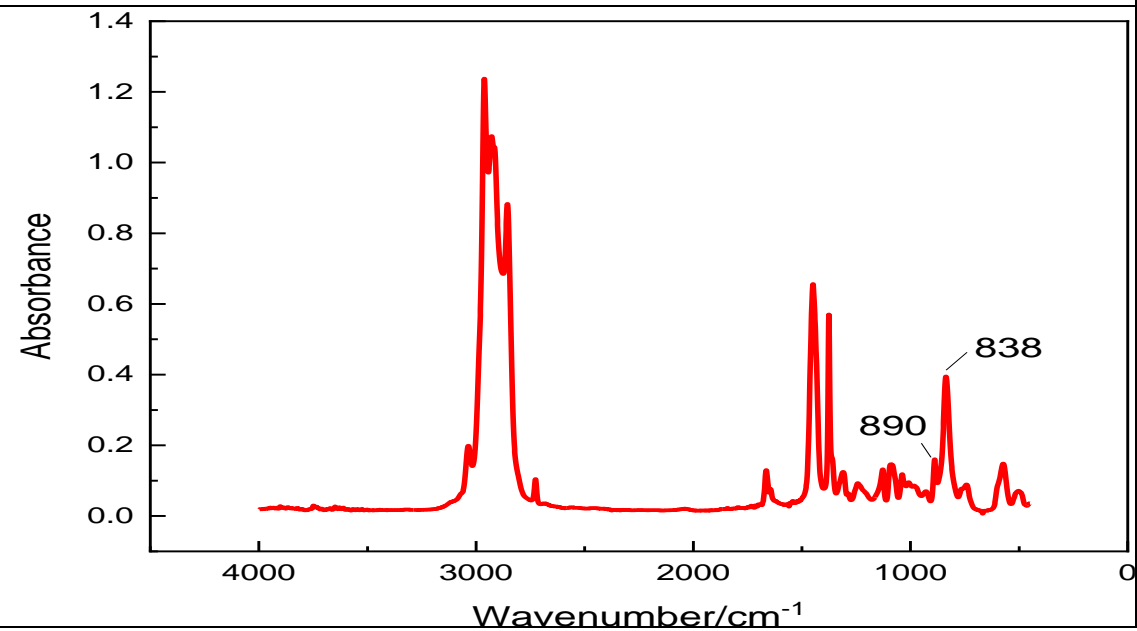

Table 1. Run-12

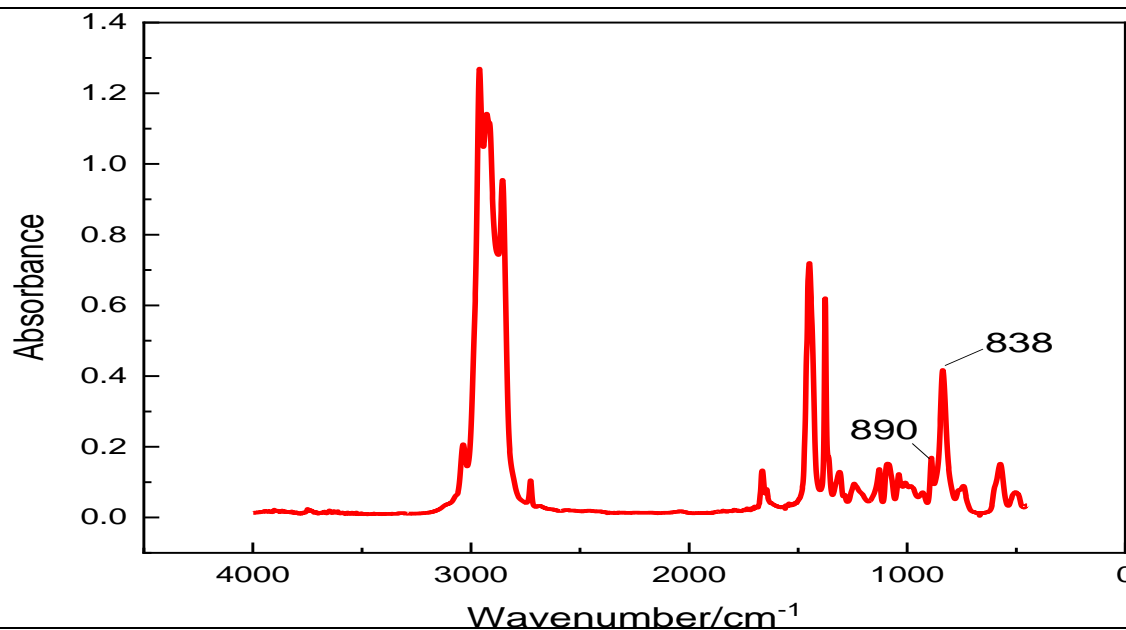

Table 1. Run-18

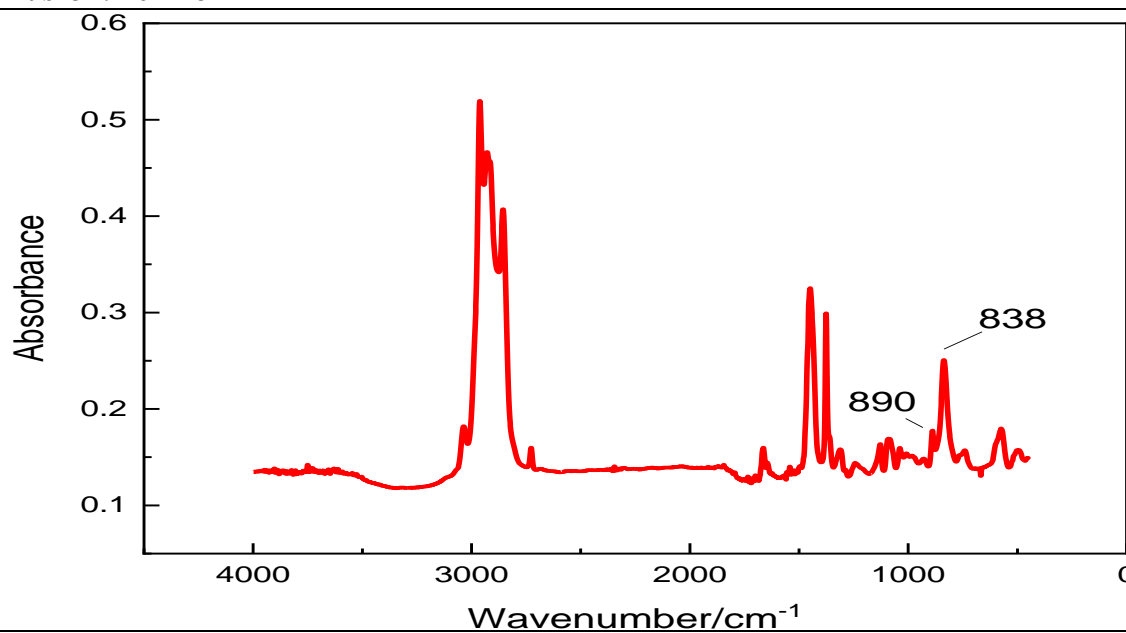

**S2.** Representative C-13 NMR spectra for sPIR samples from complexes **1**-, **3**-PDMNH-BARF catalyst system, polymerization runs 4–19 in **Table 1**.

**Table 1. Run-4**

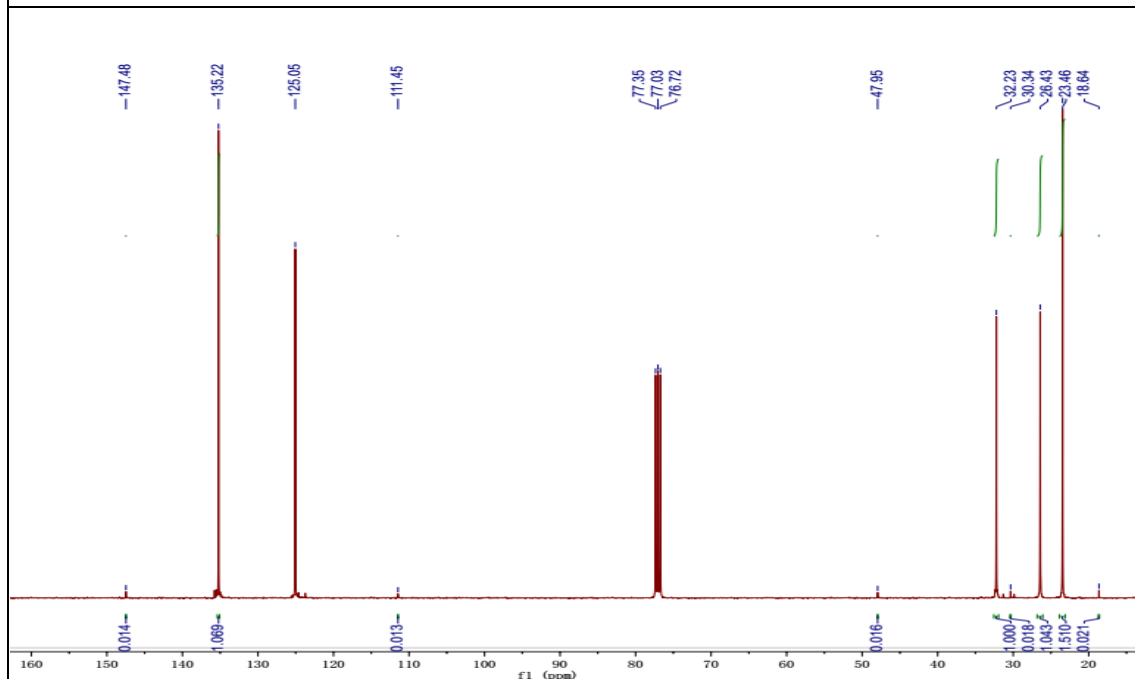

**Table 1. Run-5**

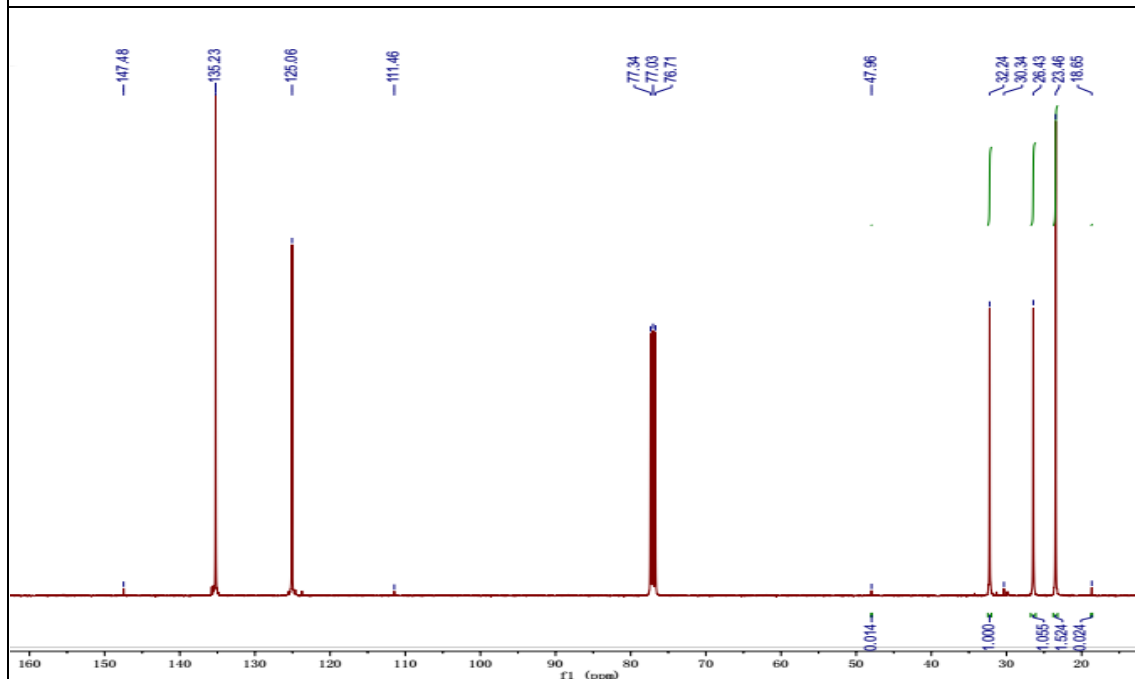

Table 1 Run-6

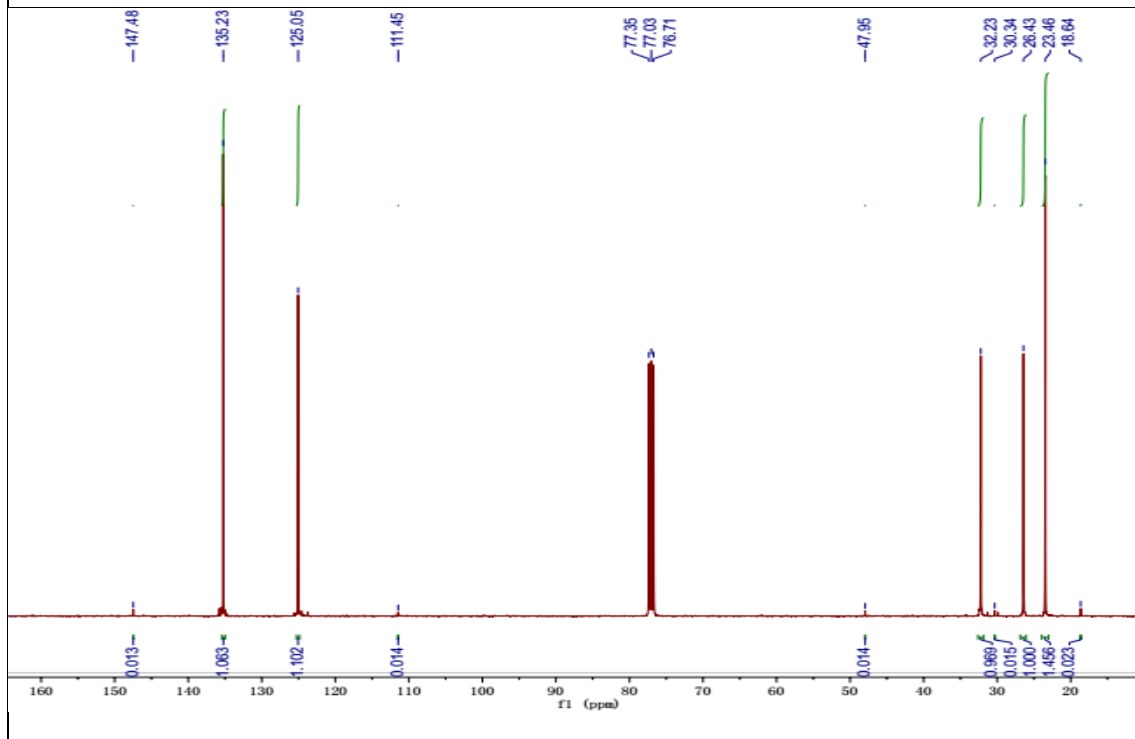

Table 1 Run-7

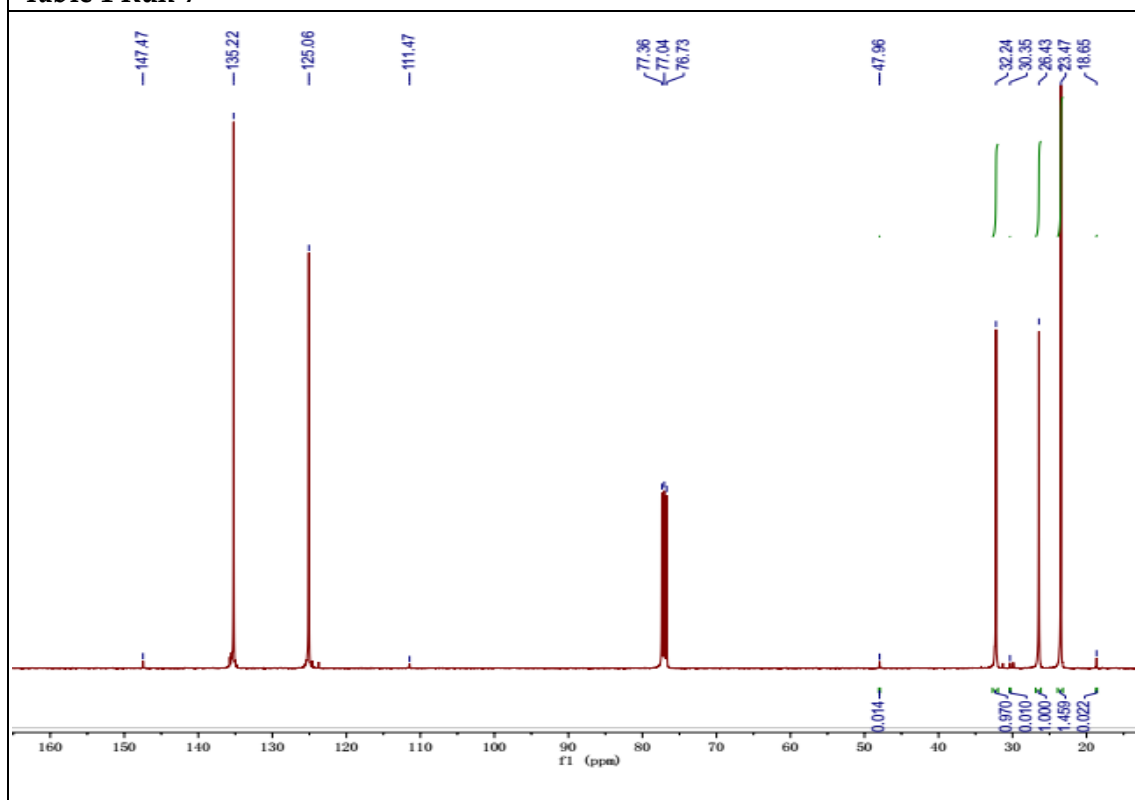



Table 1 Run-8

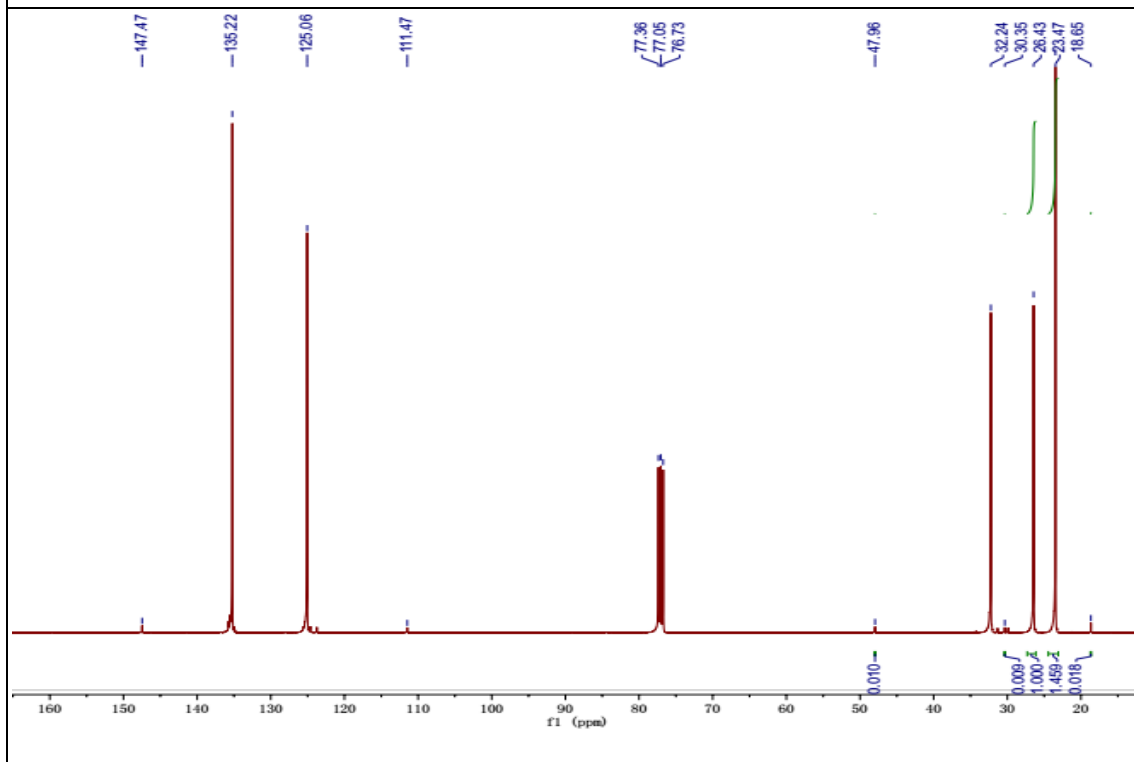

Table 1 Run-9

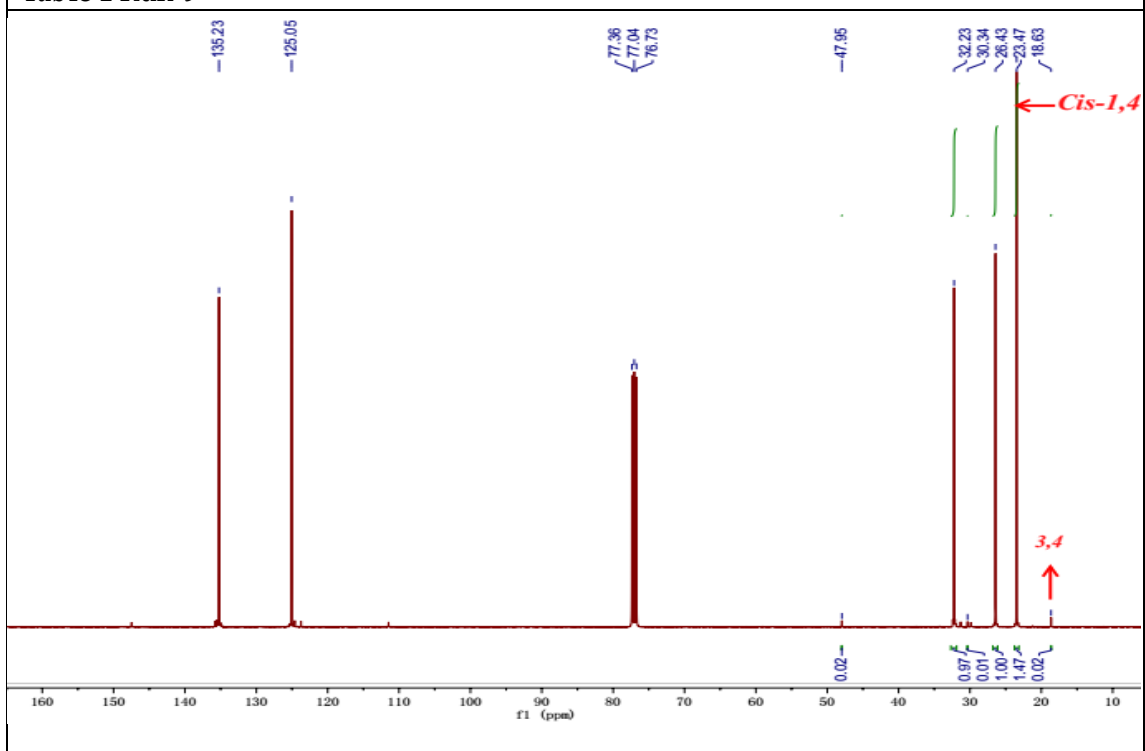

Table 1 Run-10

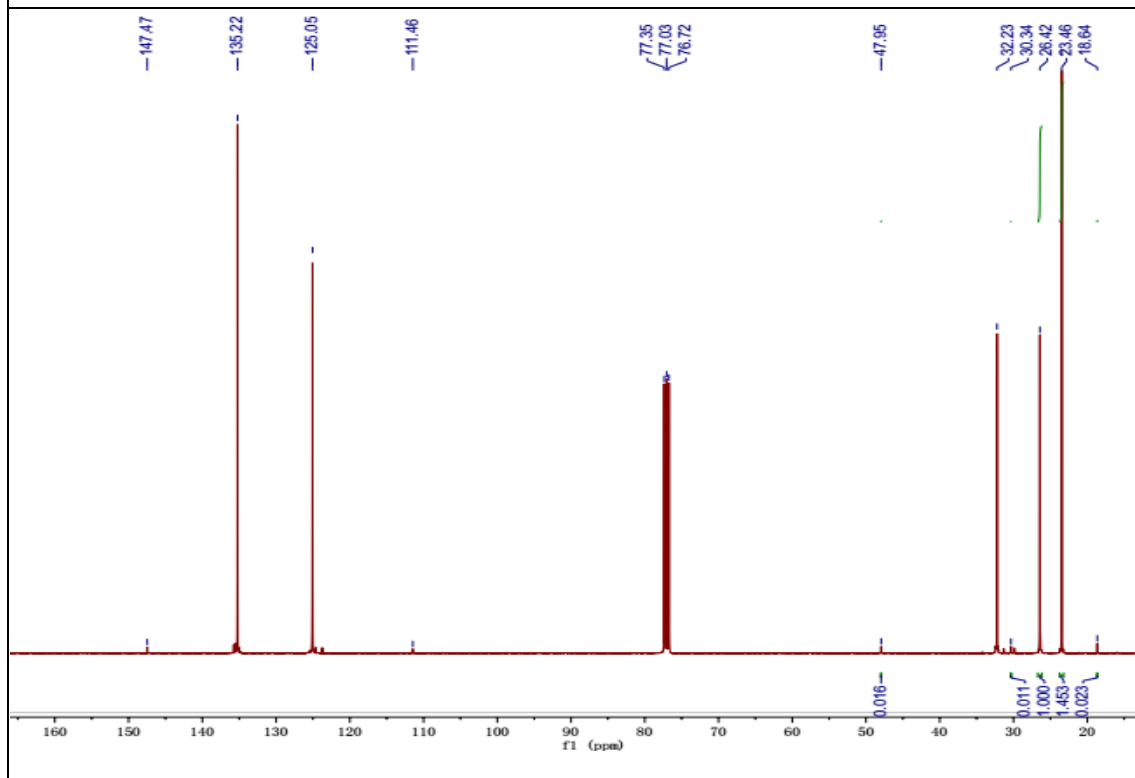

Table 1 Run-11

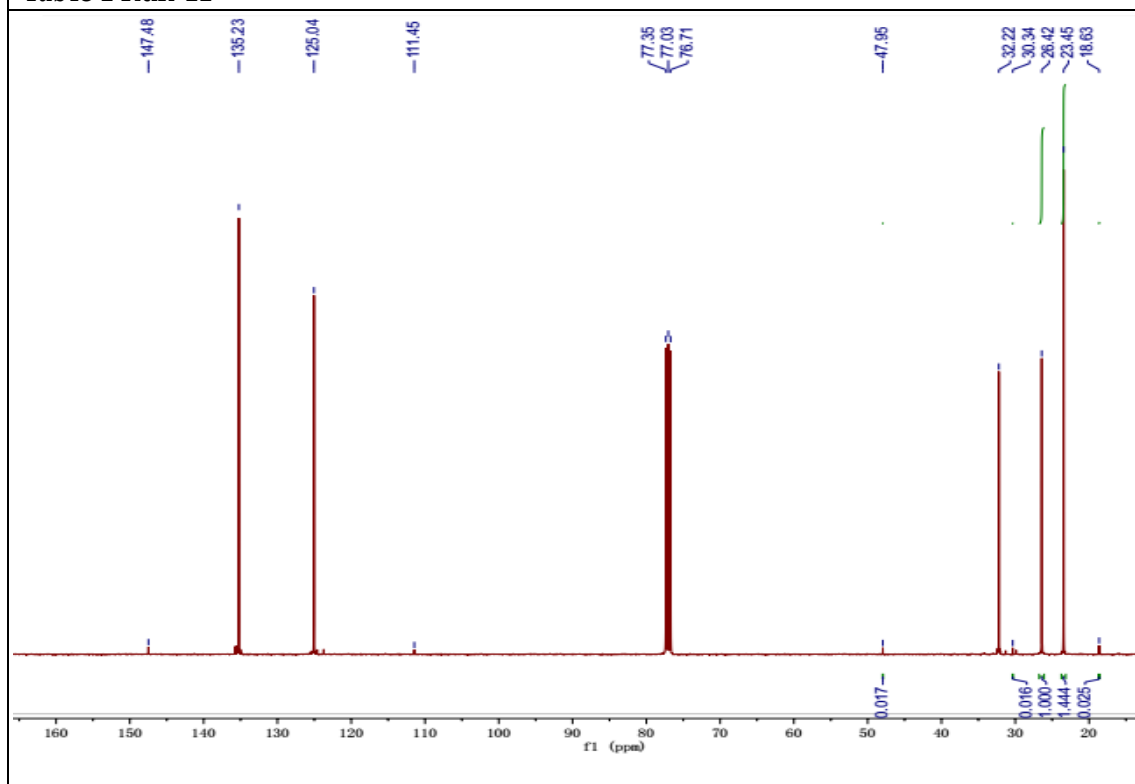

Table 1 Run-12

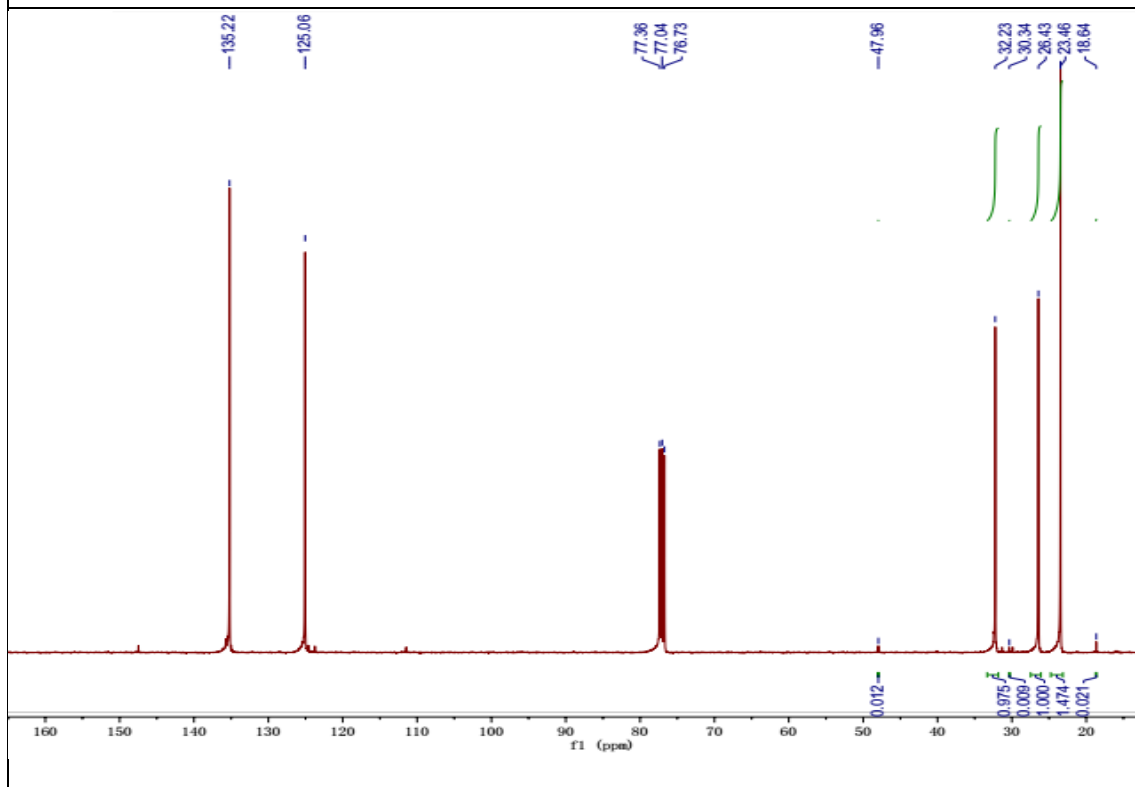

Table 1 Run-18

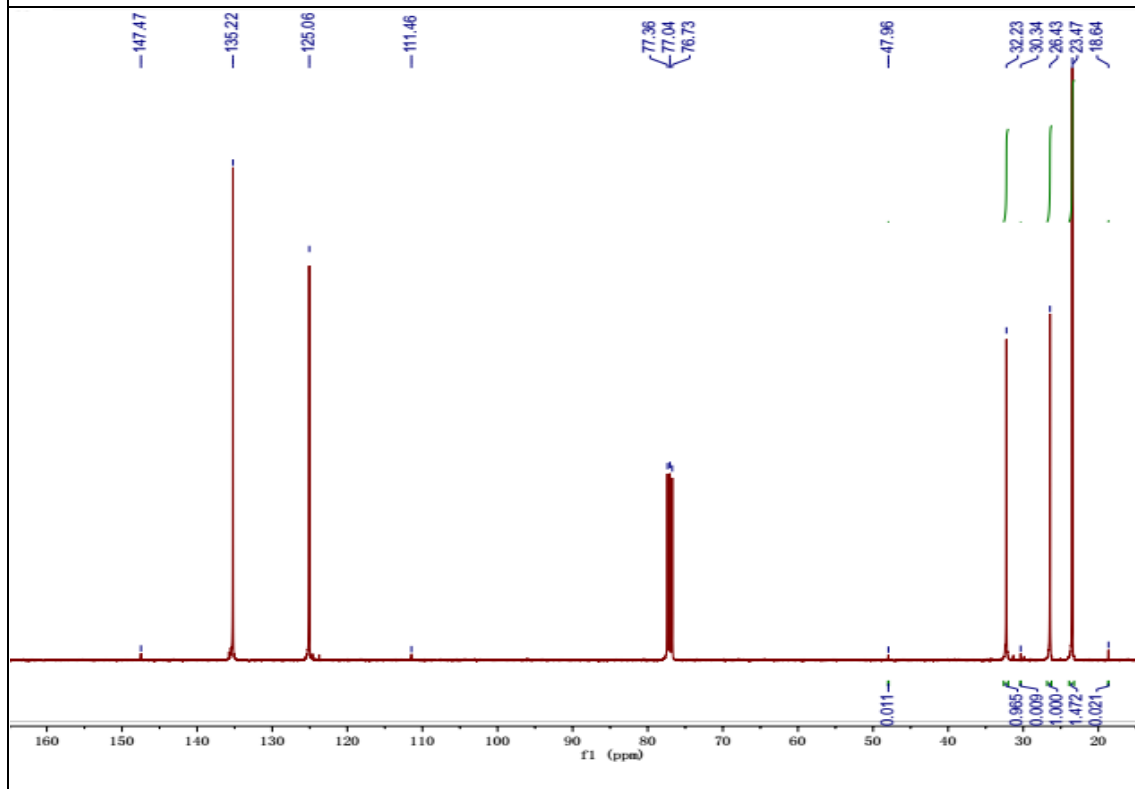

**S3.** Representative GPC diagrams for sPIR samples from complexes **1**-, **3**-PDMNH-BARF catalyst system, polymerization runs 4–19 in **Table 1**.

**Table 1 Run-1**

Distribution Plot

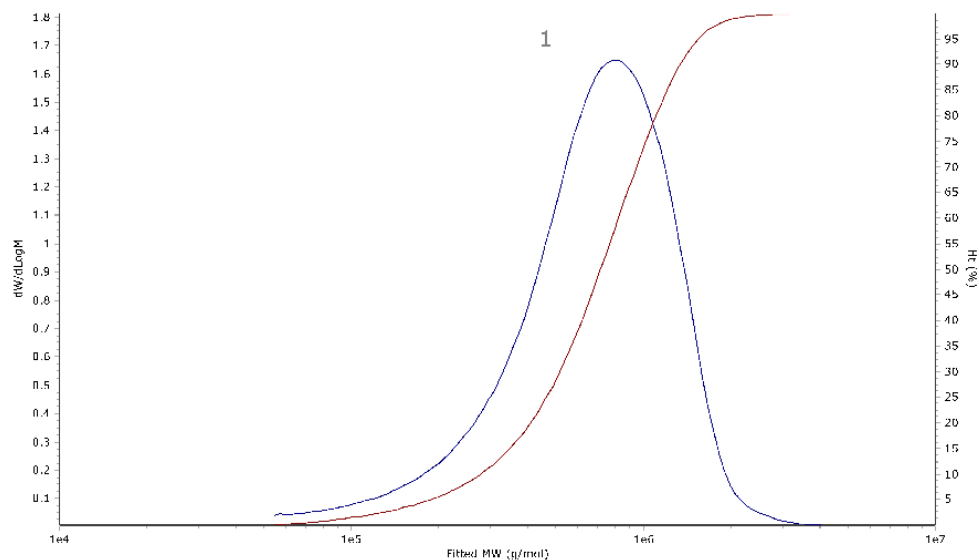

**Table 1 Run-4**

Distribution Plot

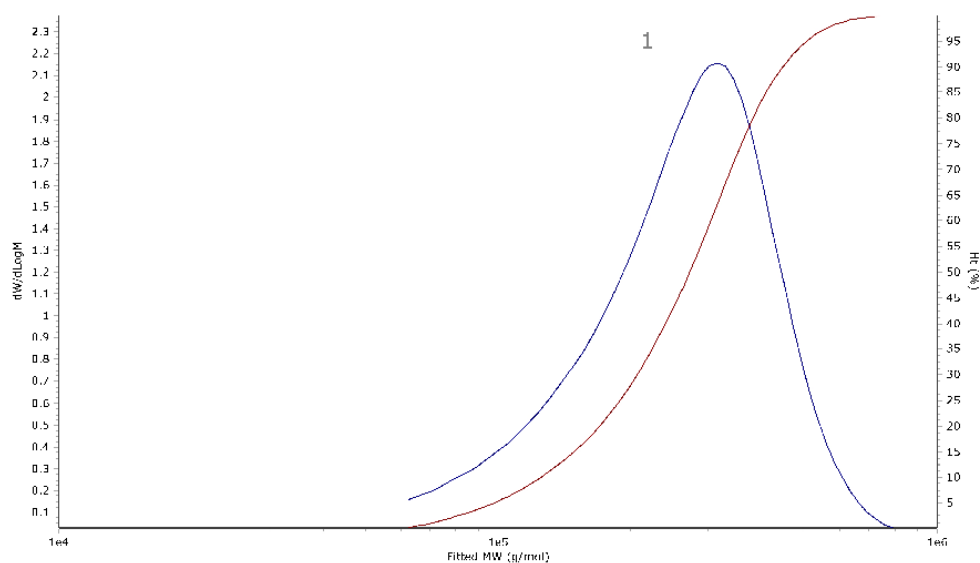

**Table 1 Run-5**

**Distribution Plot**

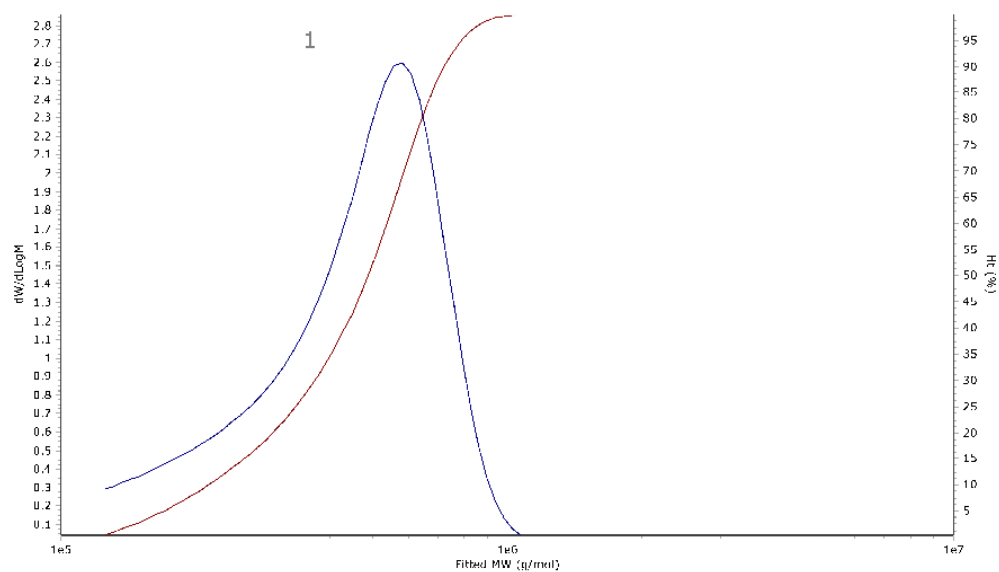

**Table 1 Run-6**

**Distribution Plot**

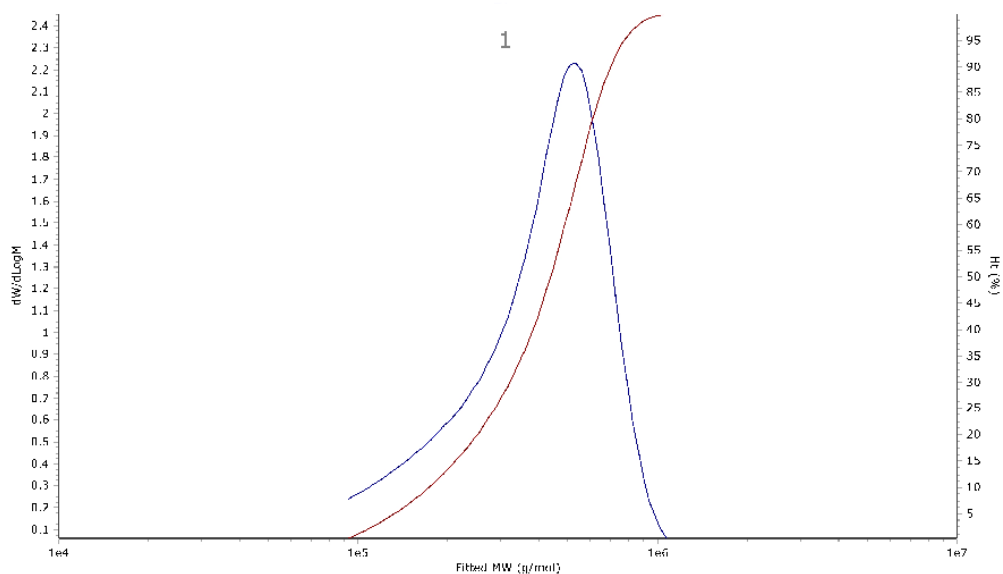

**Table 1 Run-7**

**Distribution Plot**

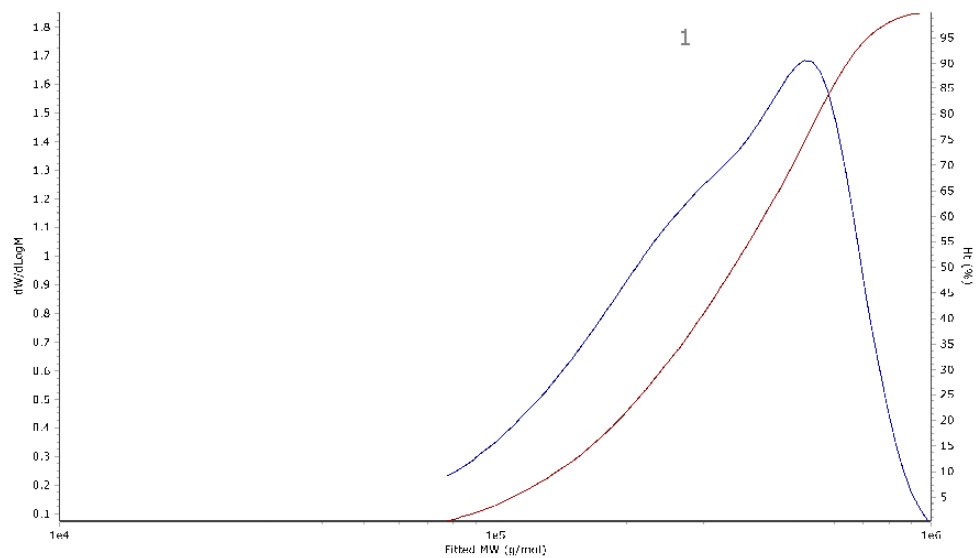

**Table 1 Run-8**

**Distribution Plot**

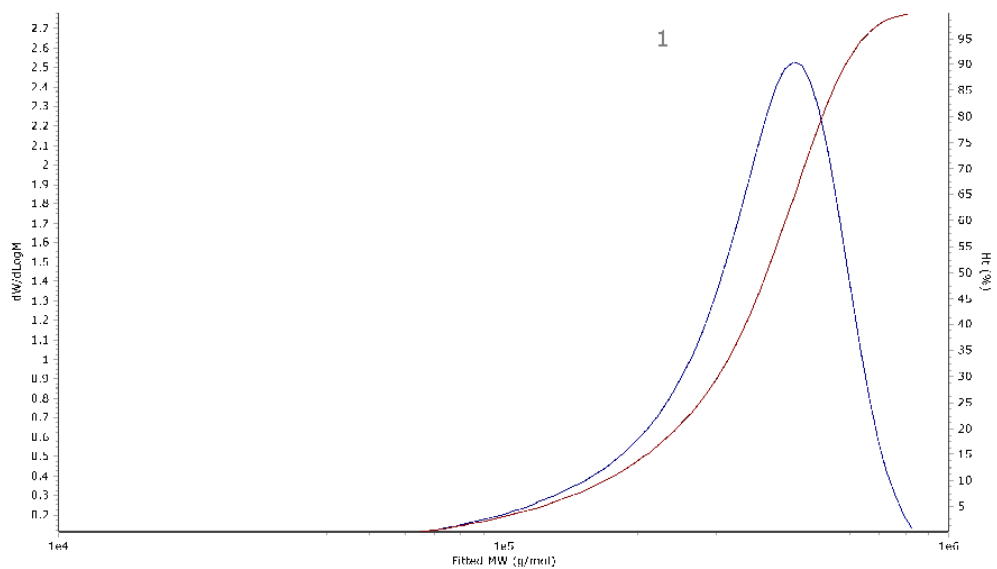

**Table 1 Run-9**

**Distribution Plot**

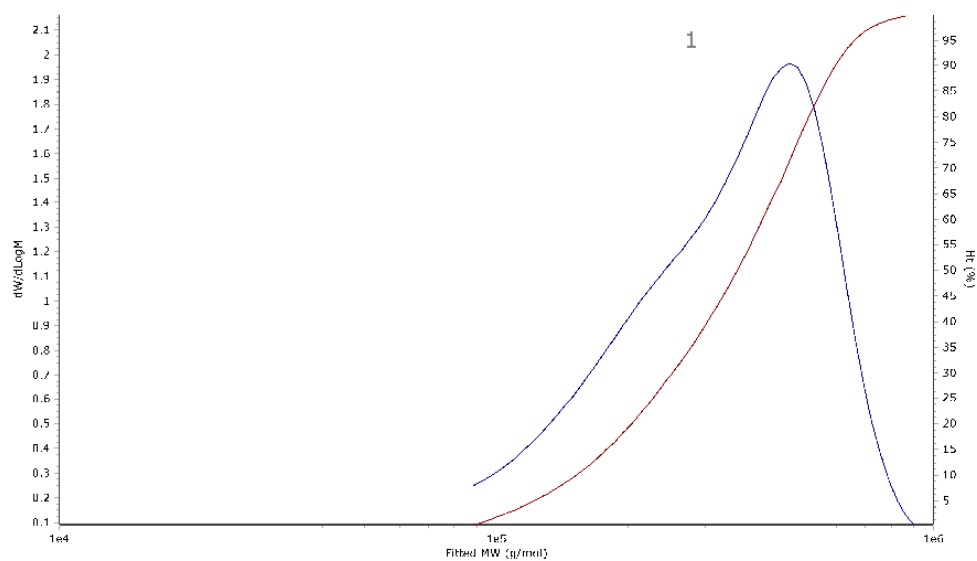

**Table 1 Run-10**

**Distribution Plot**

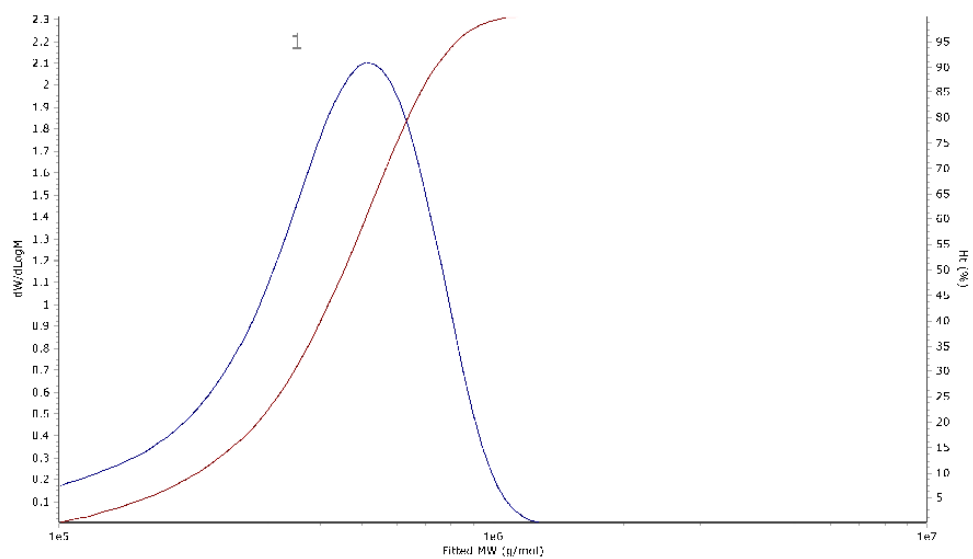

**Table 1 Run-11**

**Distribution Plot**

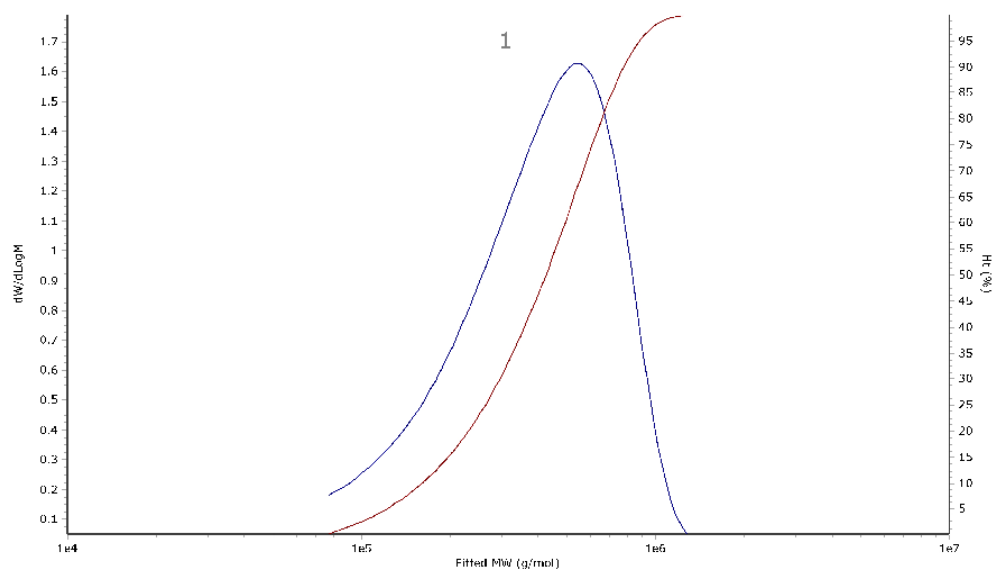

**Table 1 Run-12**

**Distribution Plot**

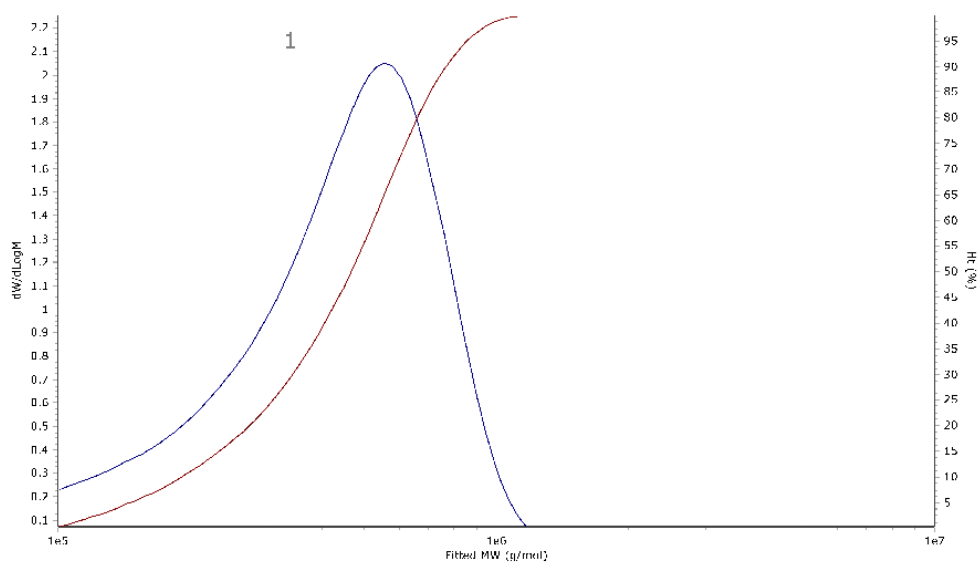



**Table 1 Run-13**

**Distribution Plot**

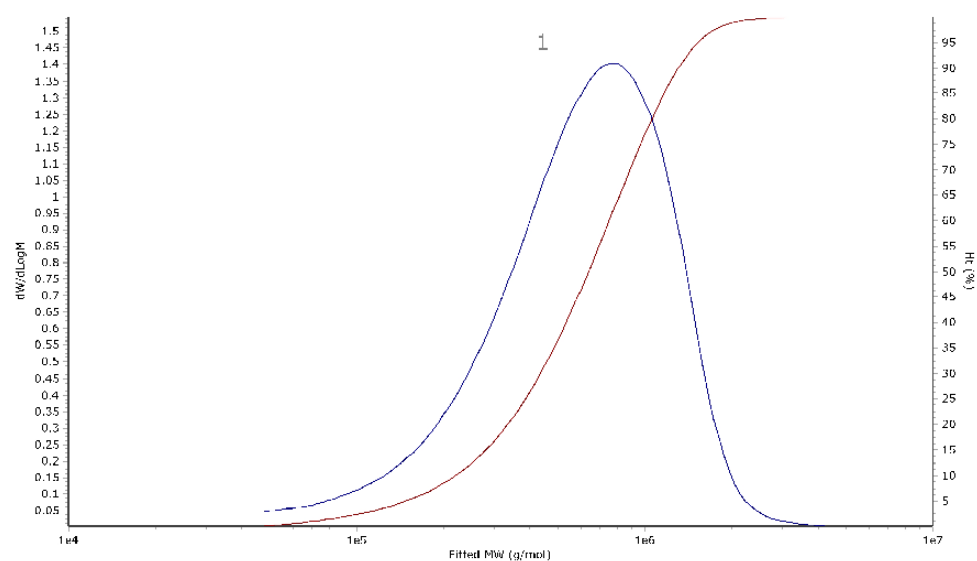

**Table 1 Run-14**

**Distribution Plot**

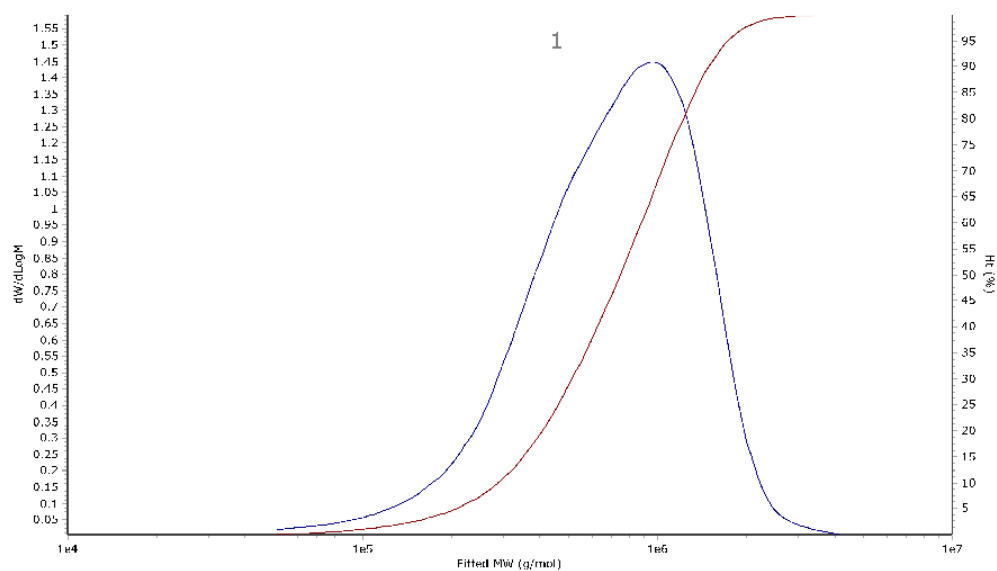

**Table 1 Run-15**

**Distribution Plot**

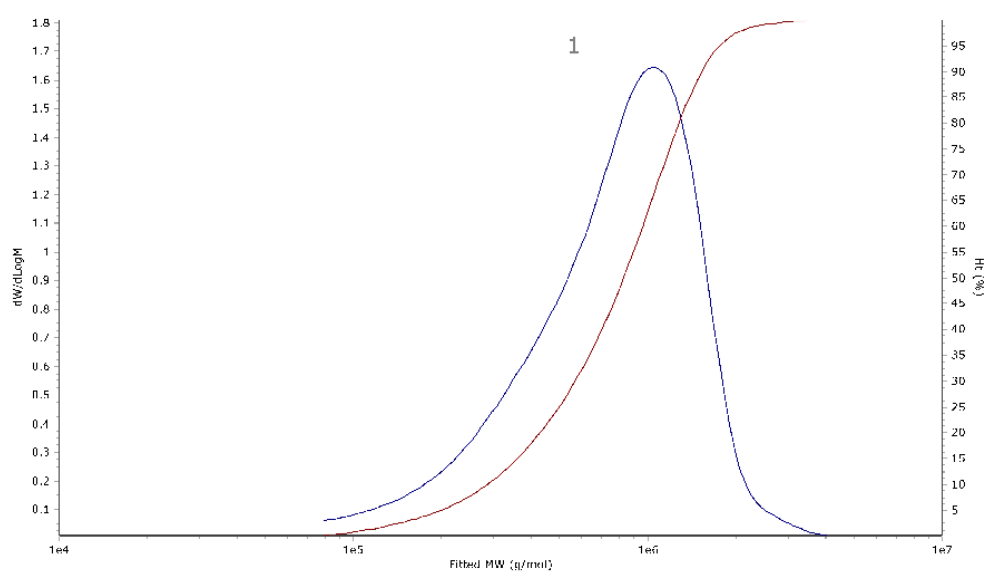

**Table 1 Run-16**

**Distribution Plot**

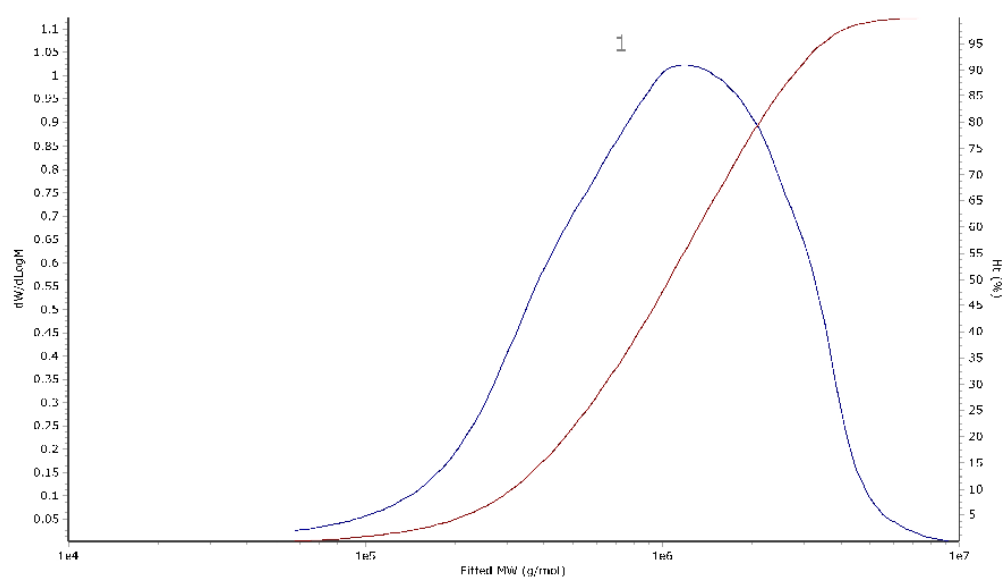

**Table 1 Run-17**

**Distribution Plot**

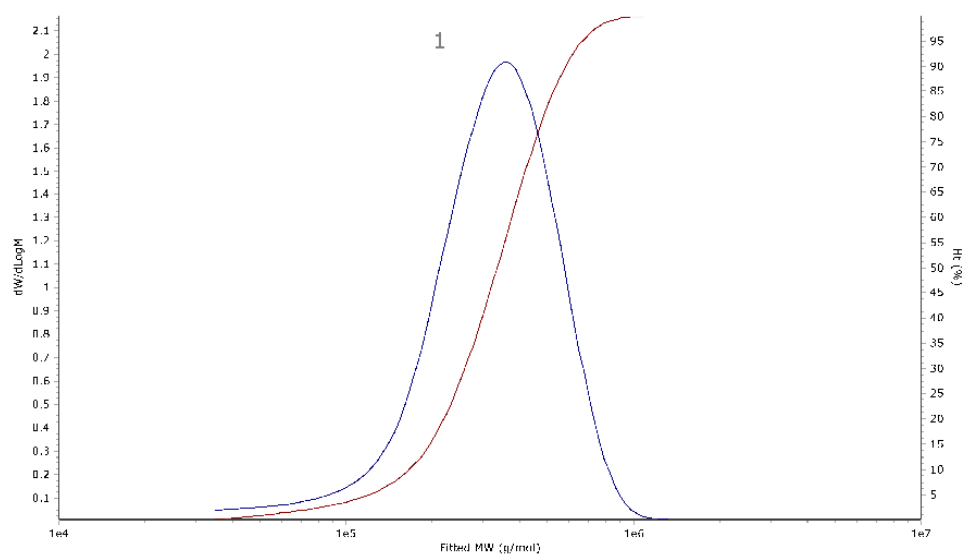

**Table 1 Run-18**

**Distribution Plot**

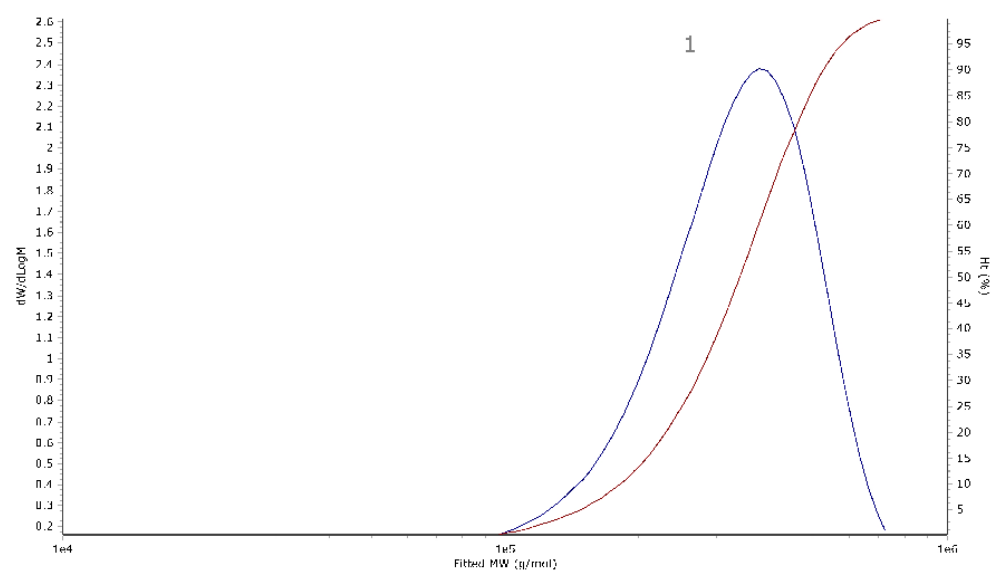

**Table 1 Run-19**

**Distribution Plot**

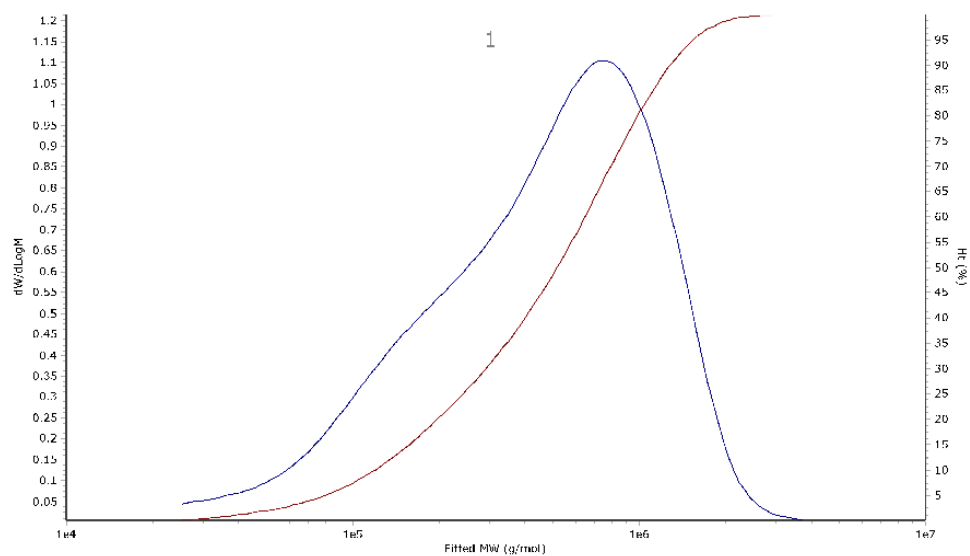

**S4.** Representative DSC diagrams for sPIR samples from complexes **1**-, **3**-PDMNH-BARF catalyst system, polymerization runs 5 and 18 in **Table 1**.

**Table 1 Run-5**

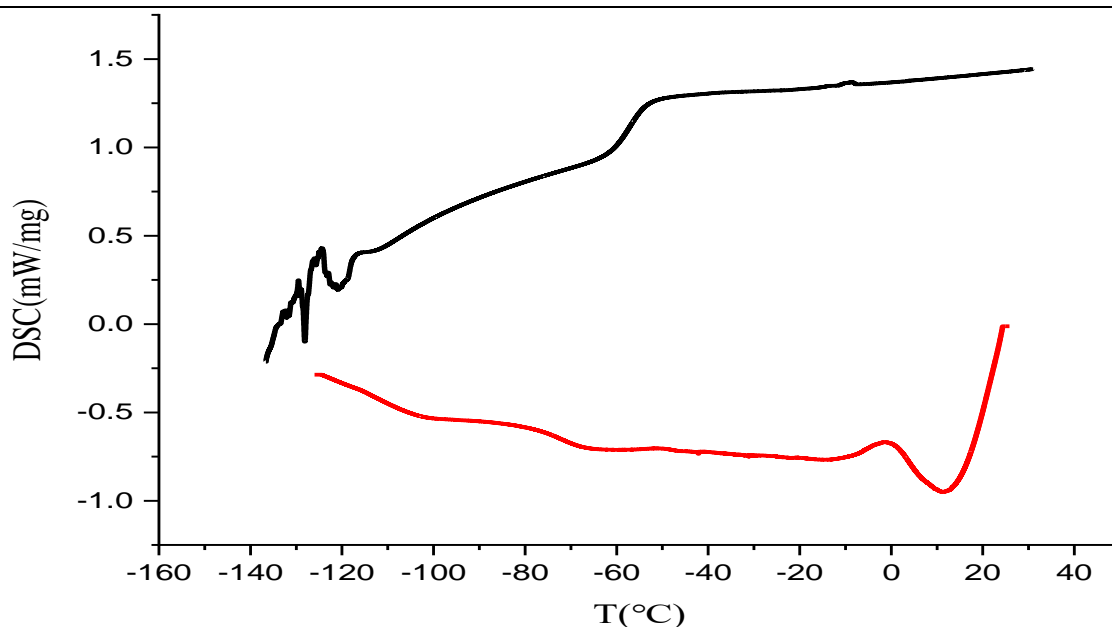

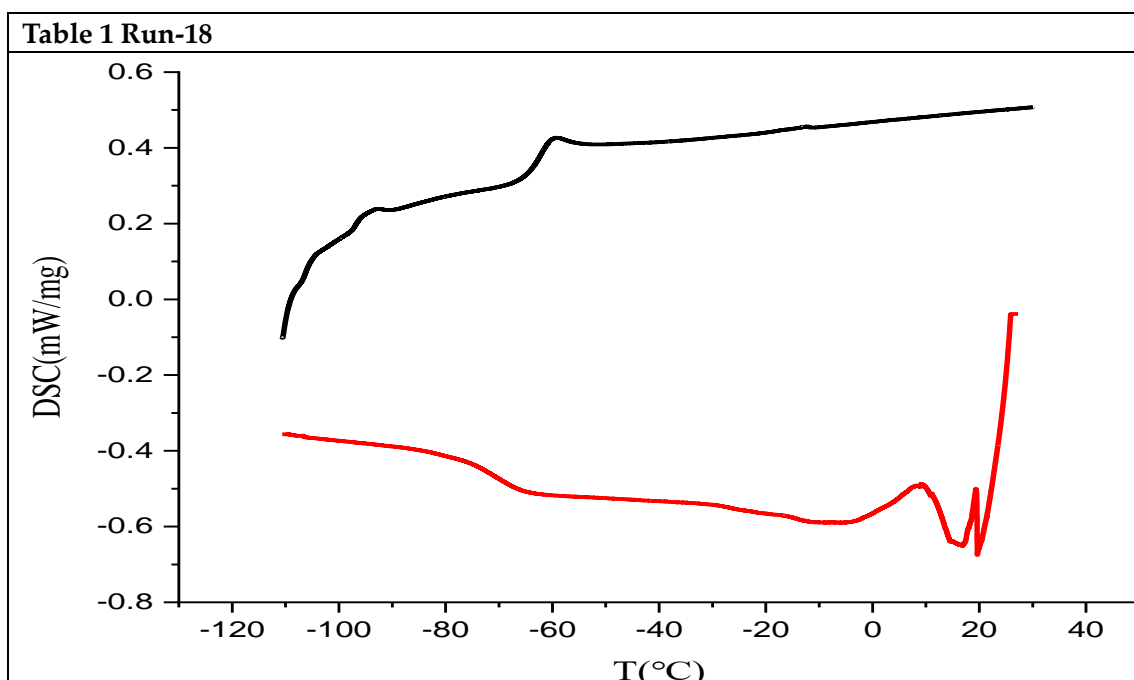

**S5.** Representative C-13 NMR spectra for sPIR samples from complexes **1**-, **2**, **3**-MMAO3A catalyst system, polymerization runs in **Table 2**.

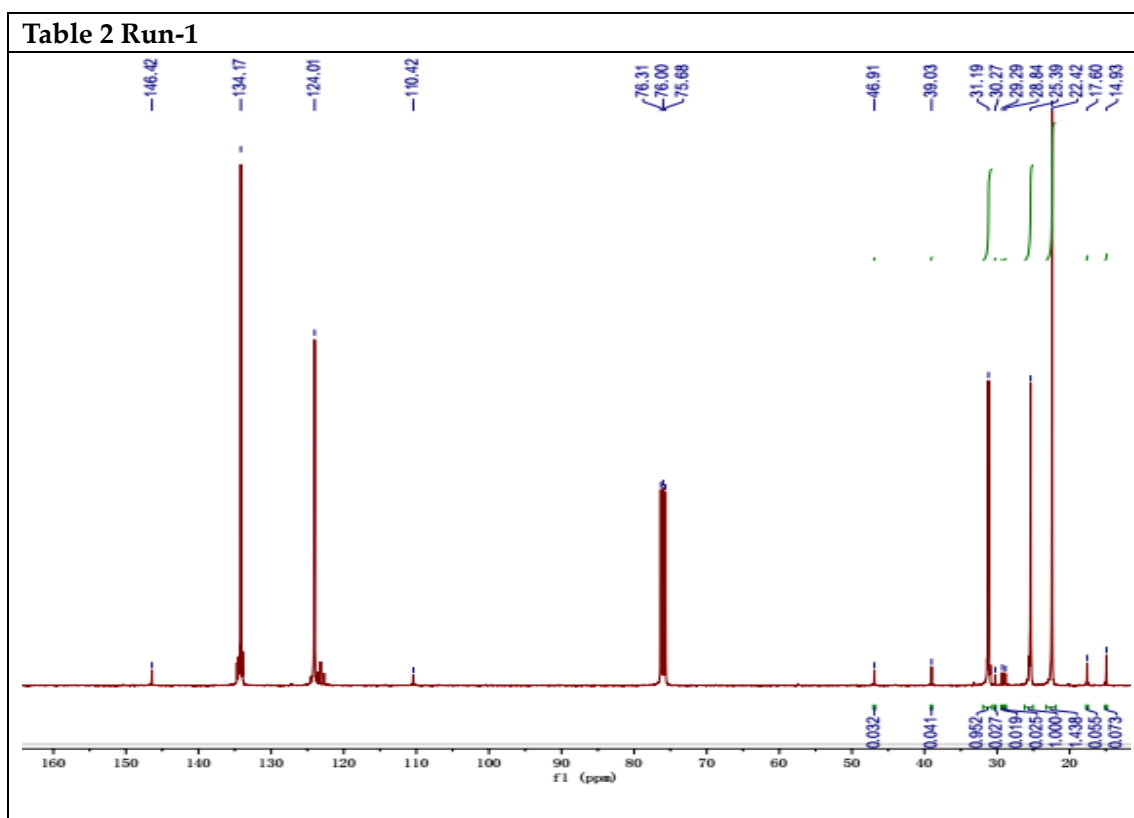

Table 2 Run-2

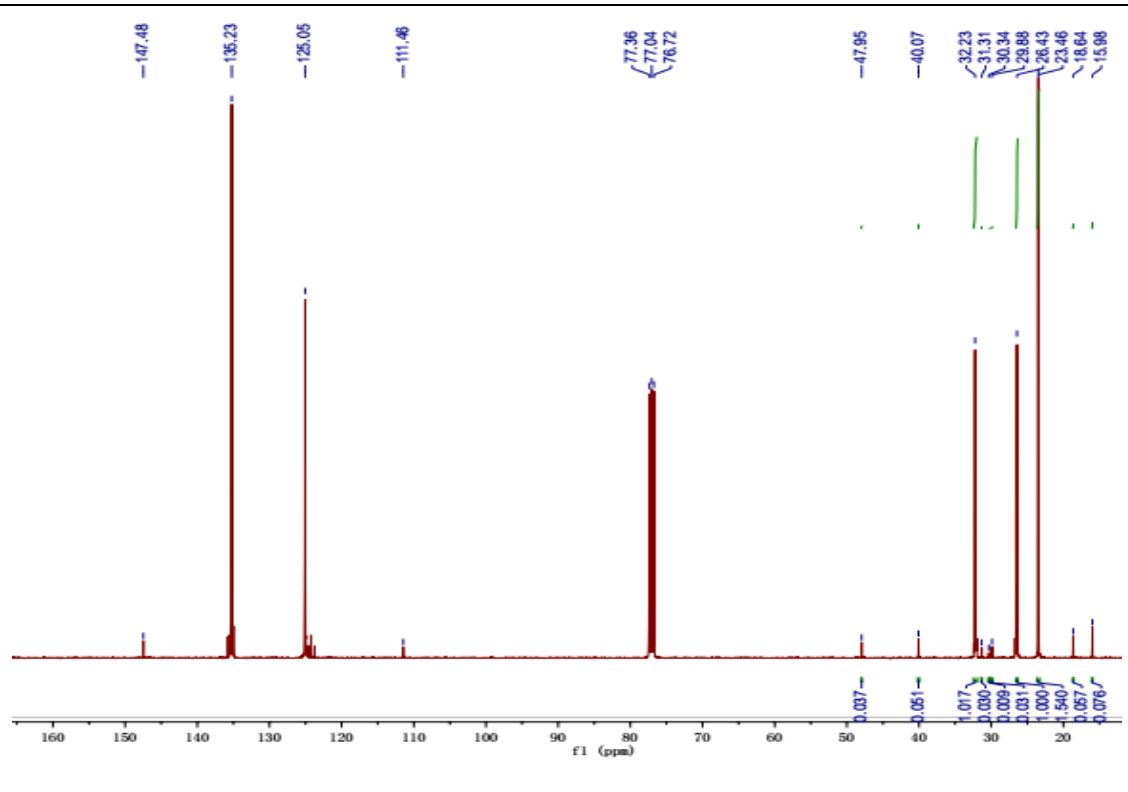

Table 2 Run-3

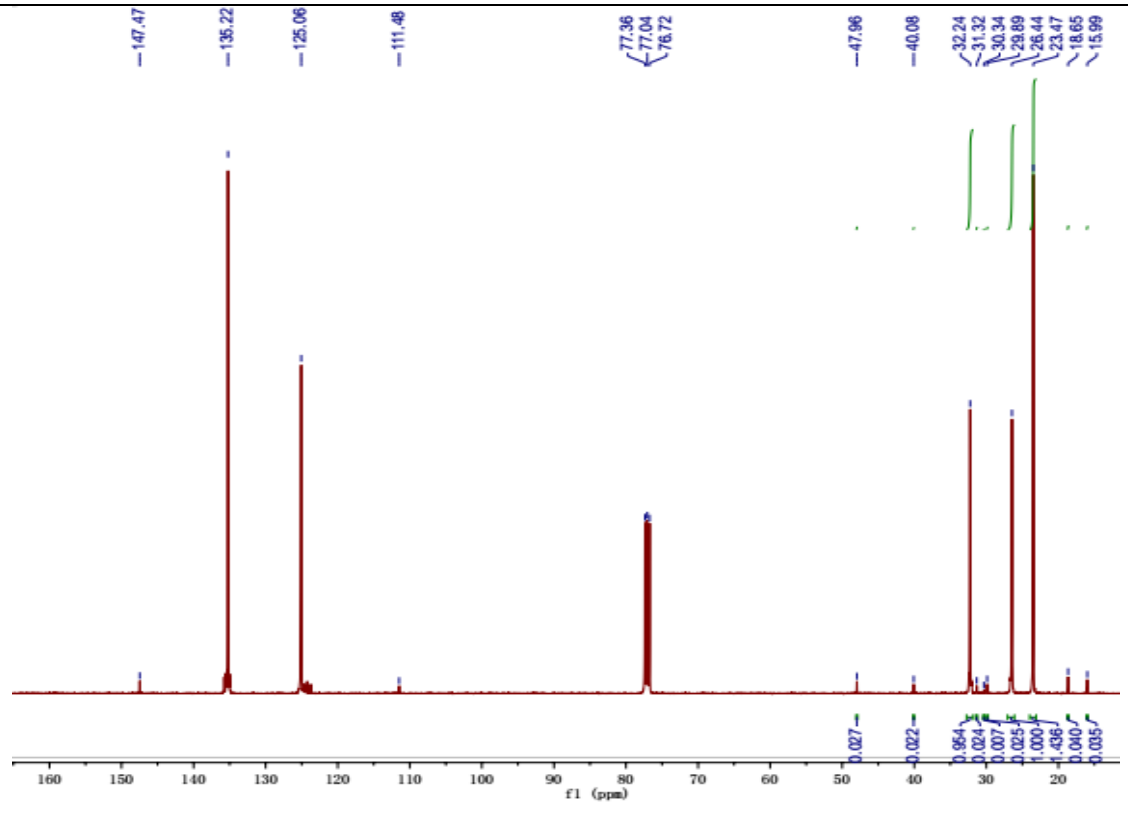

Table 2 Run-4

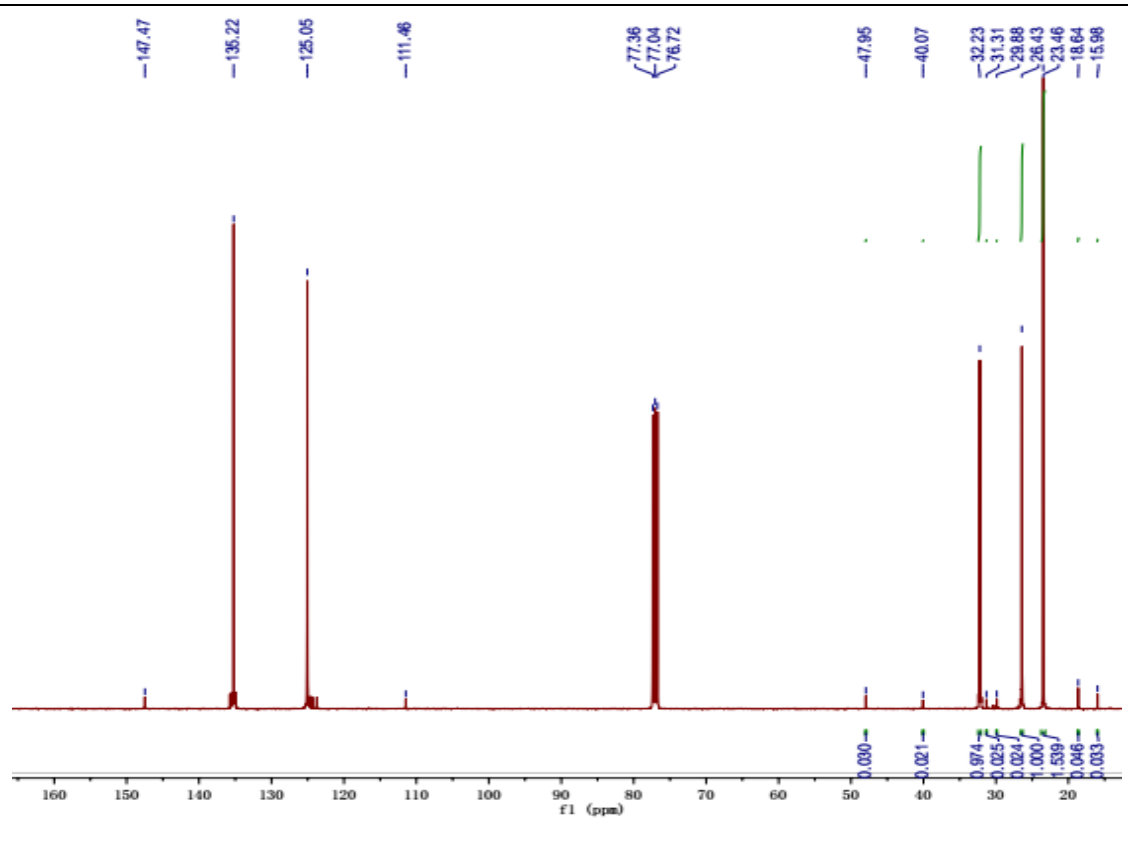

Table 2 Run-5

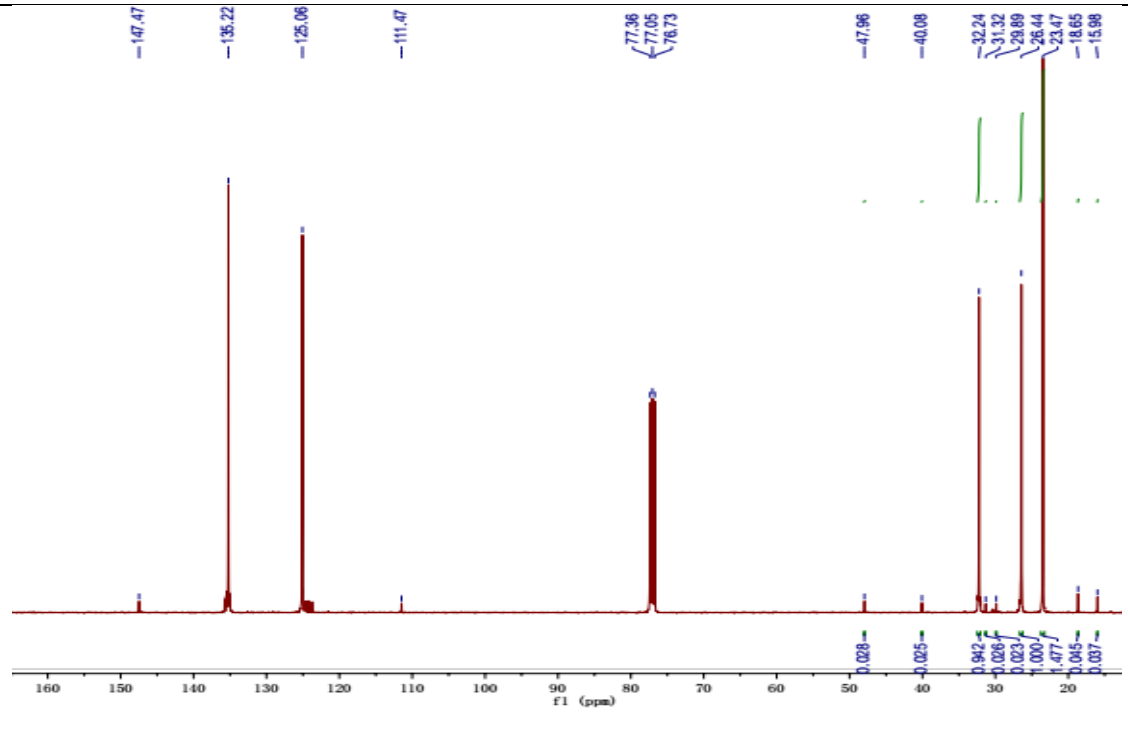

Table 2 Run-6

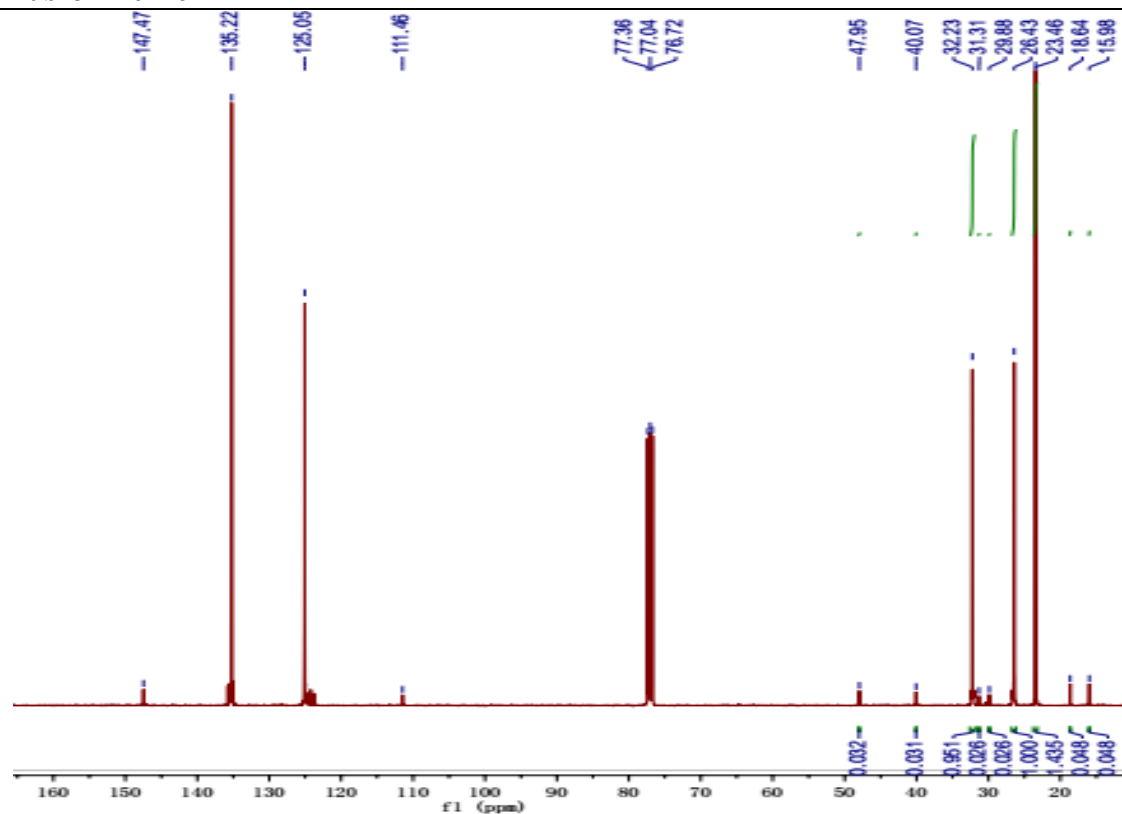

Table 2 Run-7

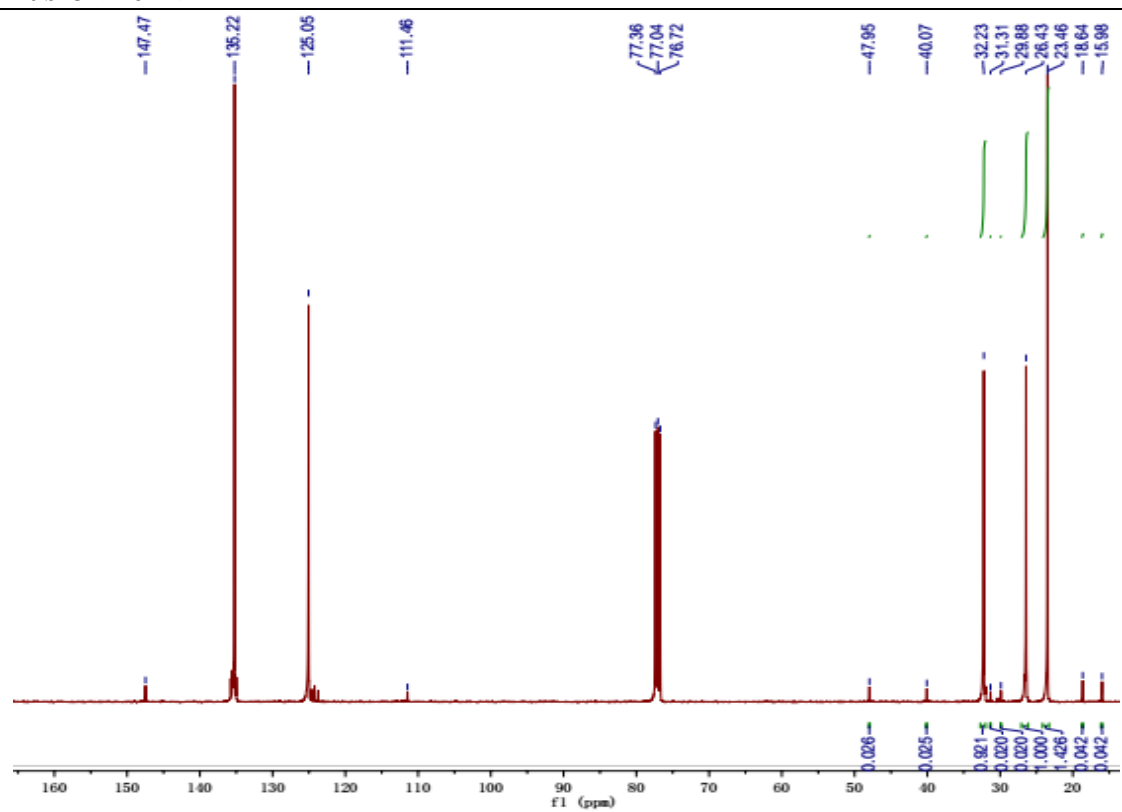



Table 2 Run-8

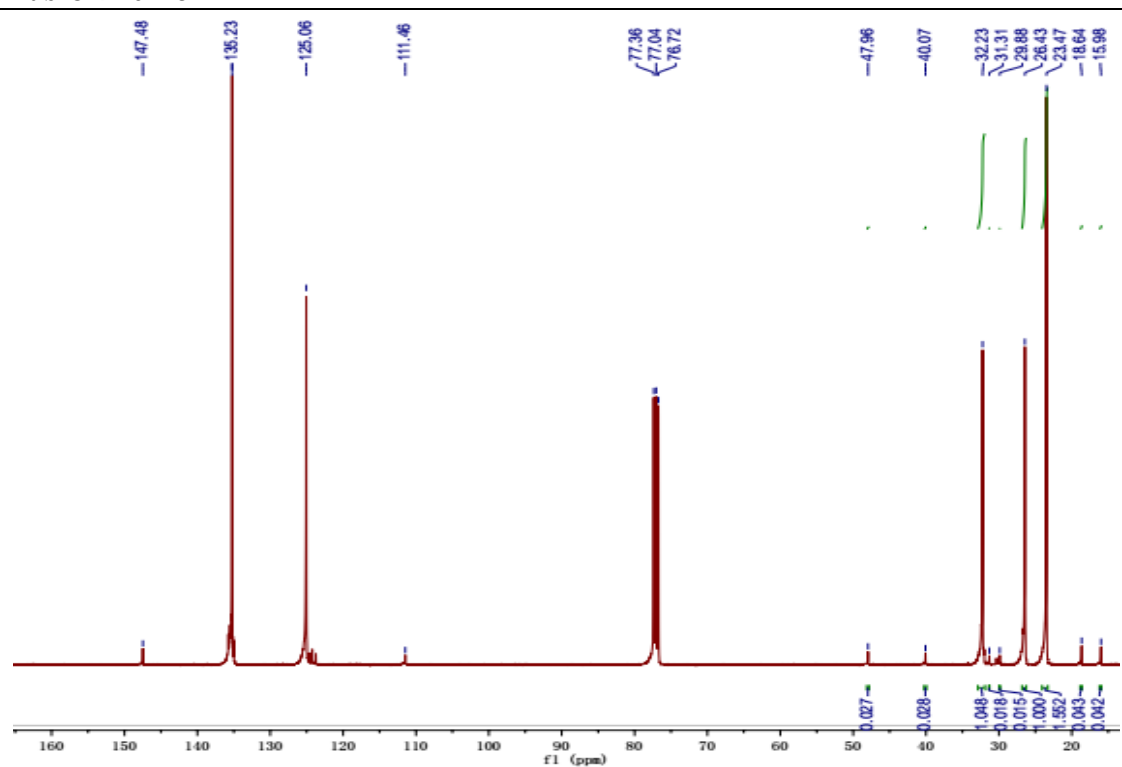

Table 2 Run-9

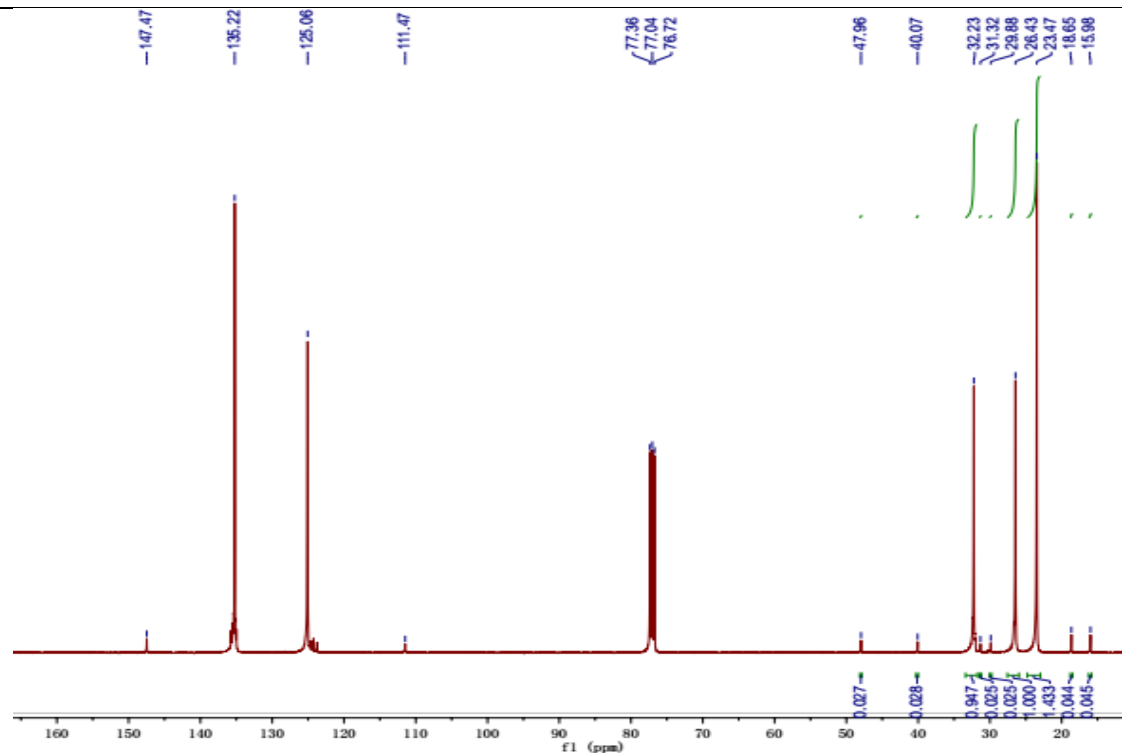

Table 2 Run-10

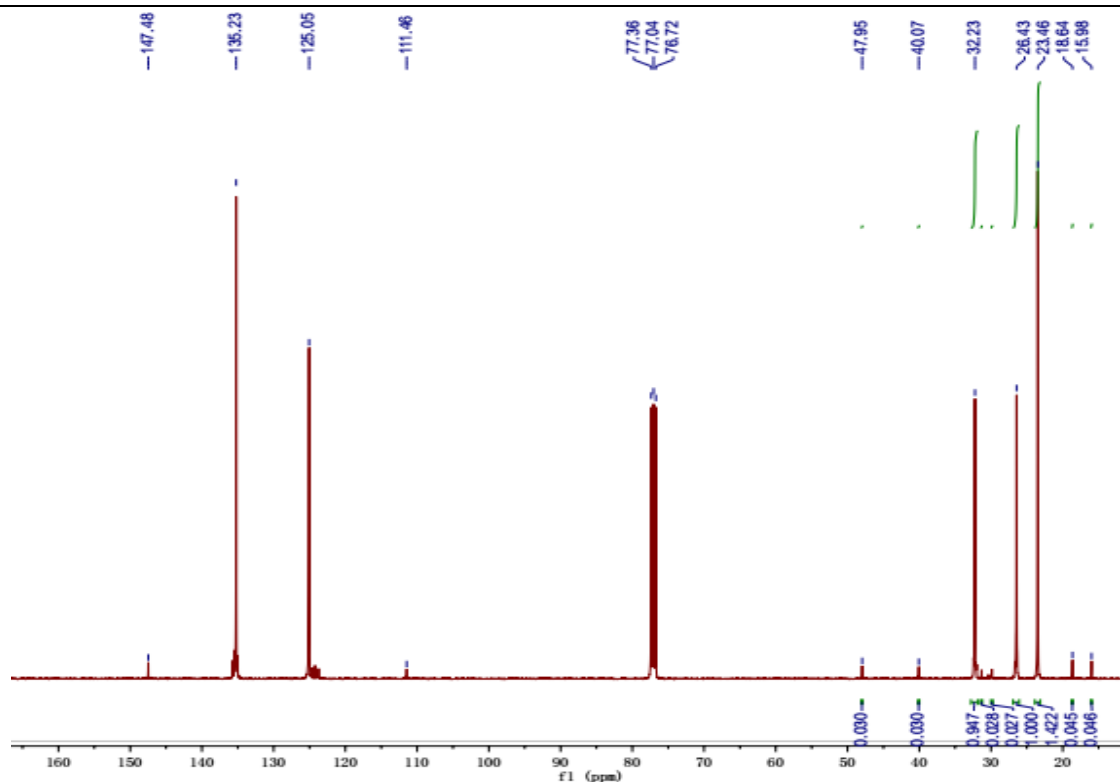

S6. Representative GPC plots for sPIR samples from complexes **1**, **2**, **3**-MMAO3A catalyst system, polymerization runs in **Table 2**.

Table 2 Run-1

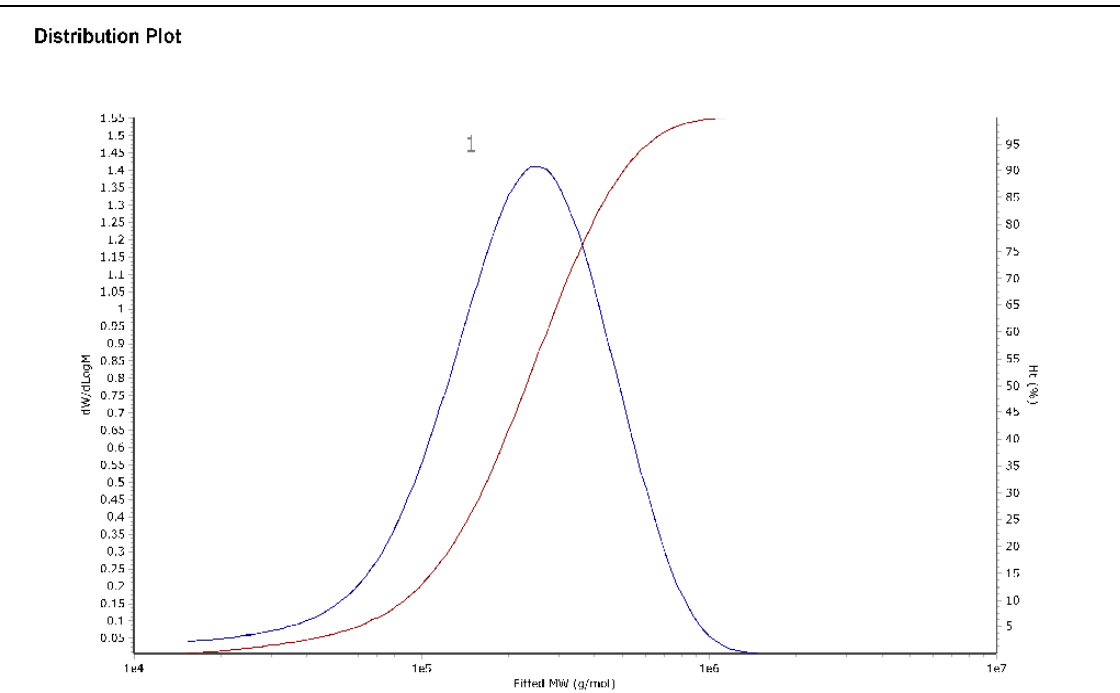

**Table 2 Run-2**

**Distribution Plot**

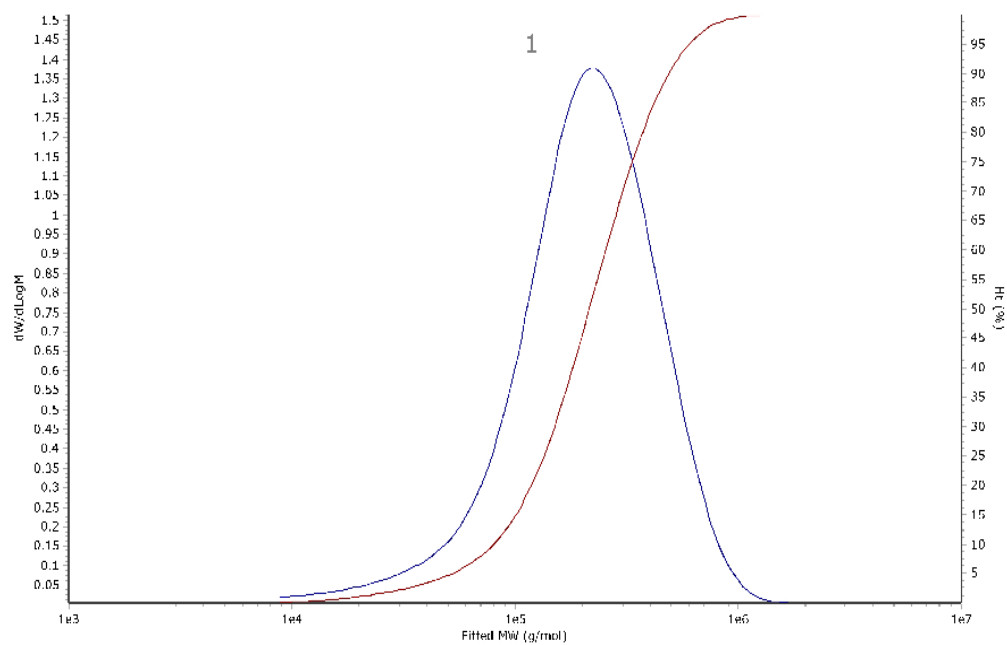

**Table 2 Run-3**

**Distribution Plot**

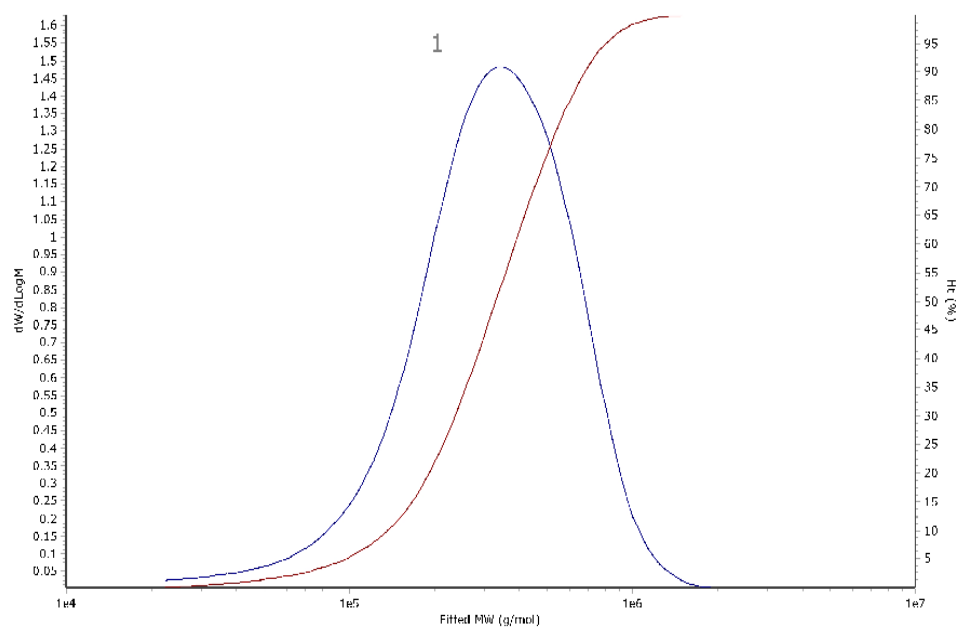

**Table 2 Run-4**

**Distribution Plot**

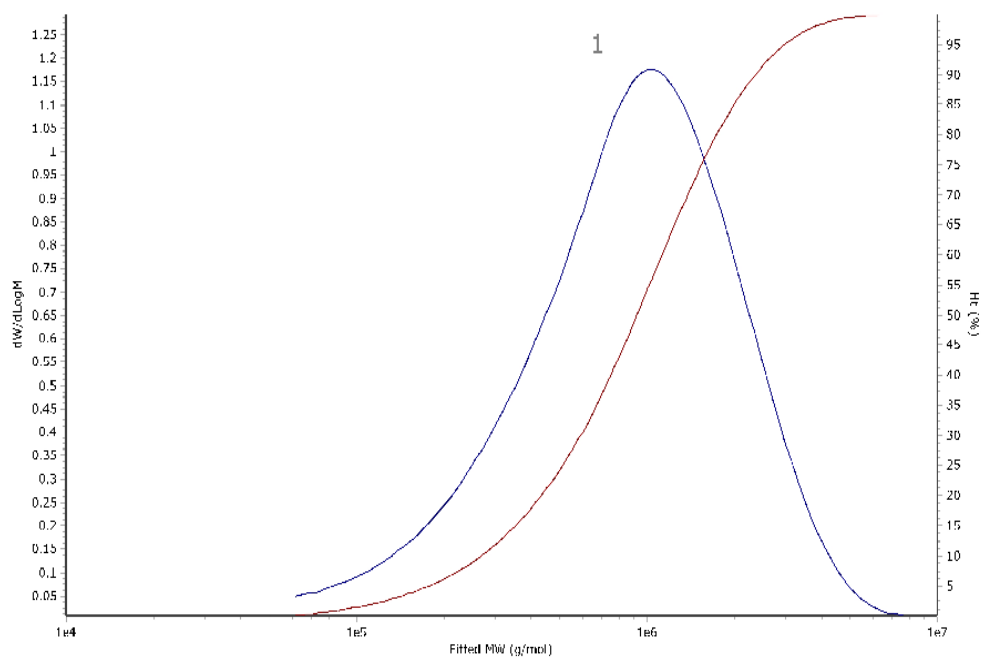

**Table 2 Run-5**

**Distribution Plot**

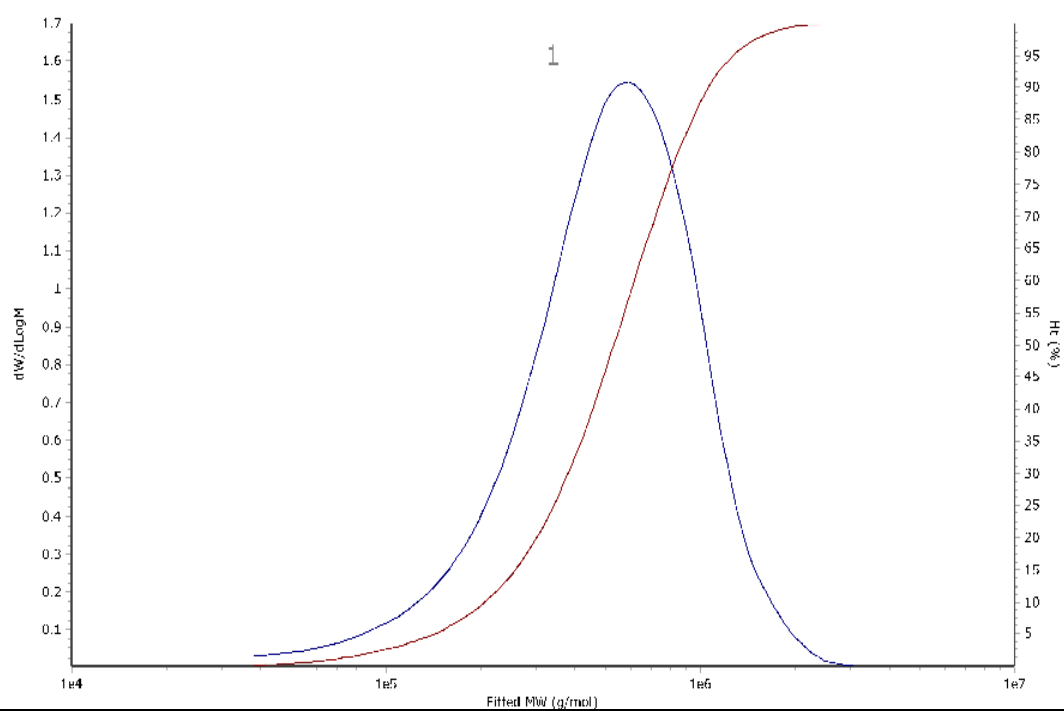

**Table 2 Run-6**

**Distribution Plot**

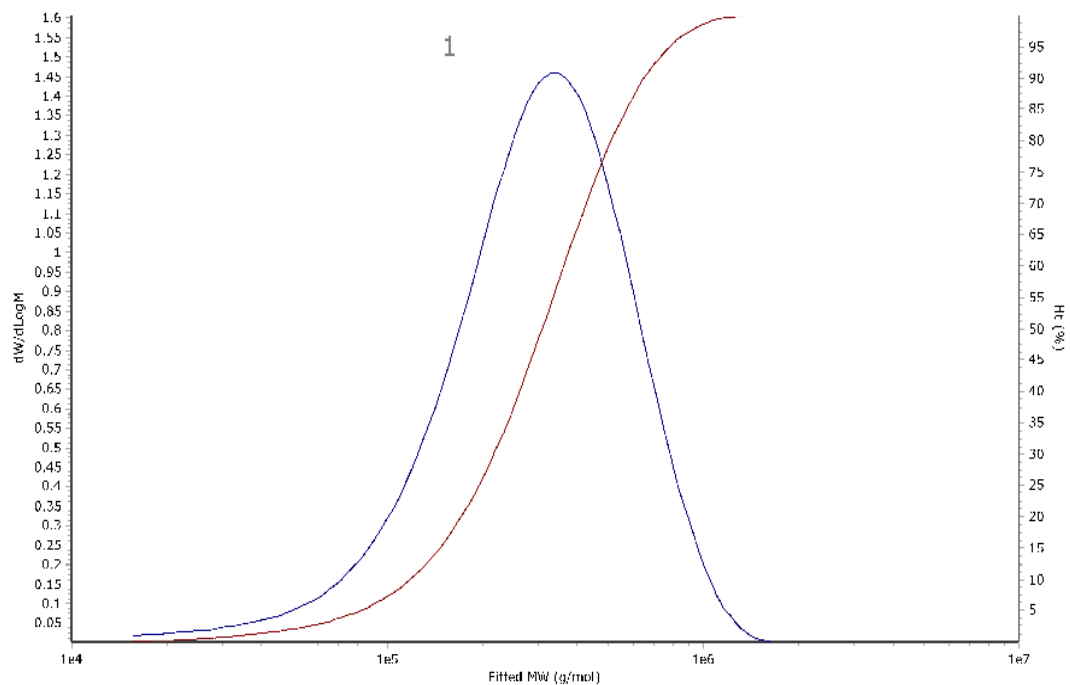

**Table 2 Run-7**

**Distribution Plot**

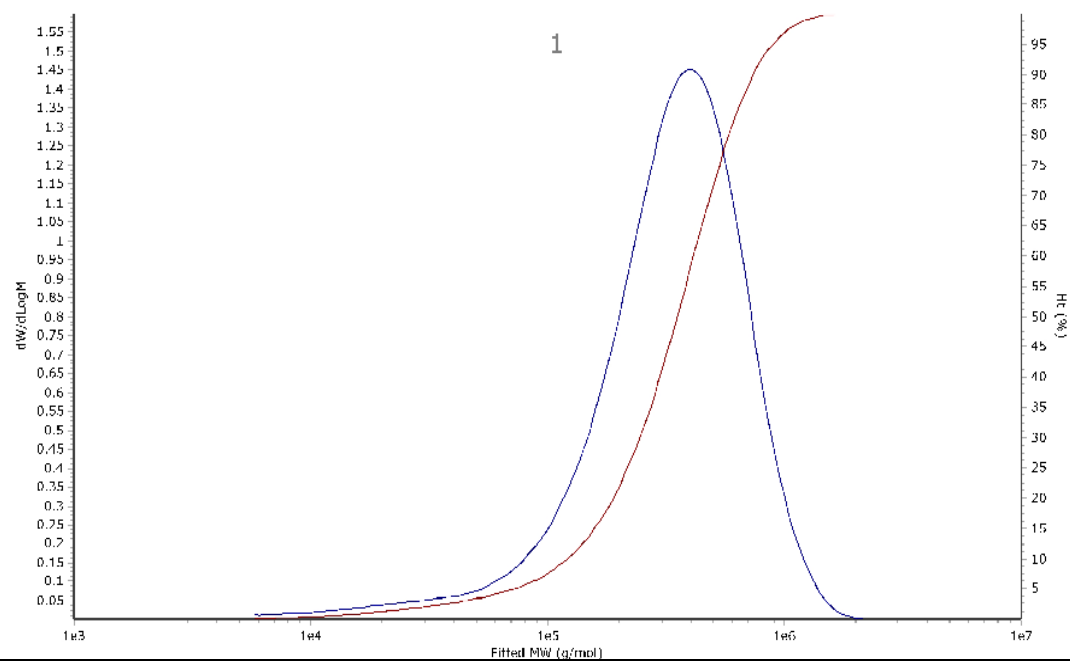

**Table 2 Run-8**

**Distribution Plot**

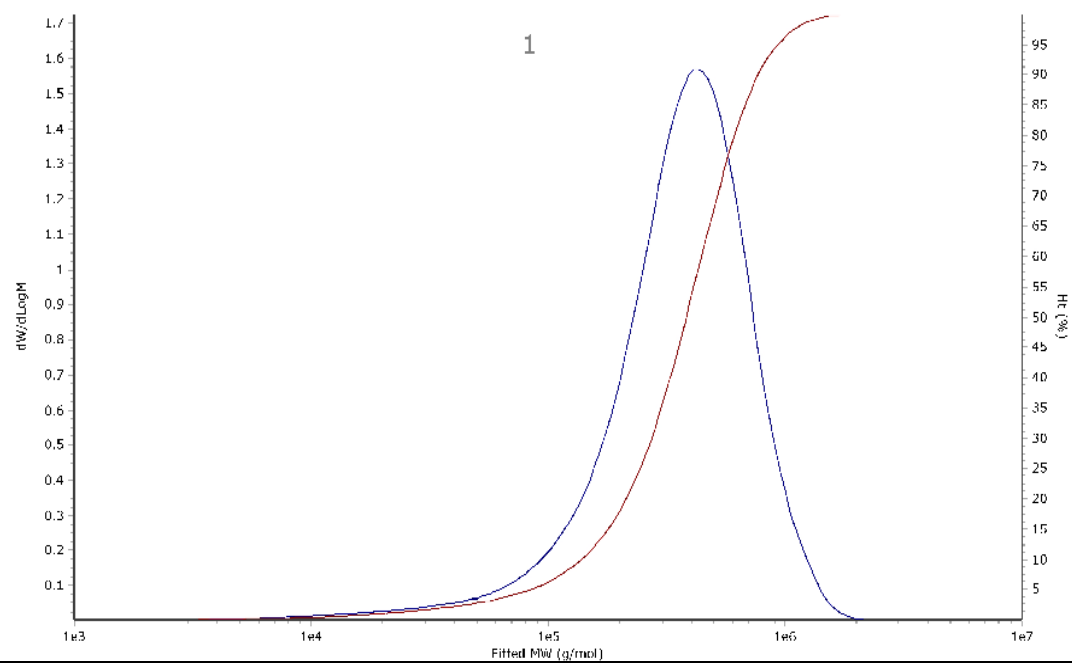

**Table 2 Run-9**

**Distribution Plot**

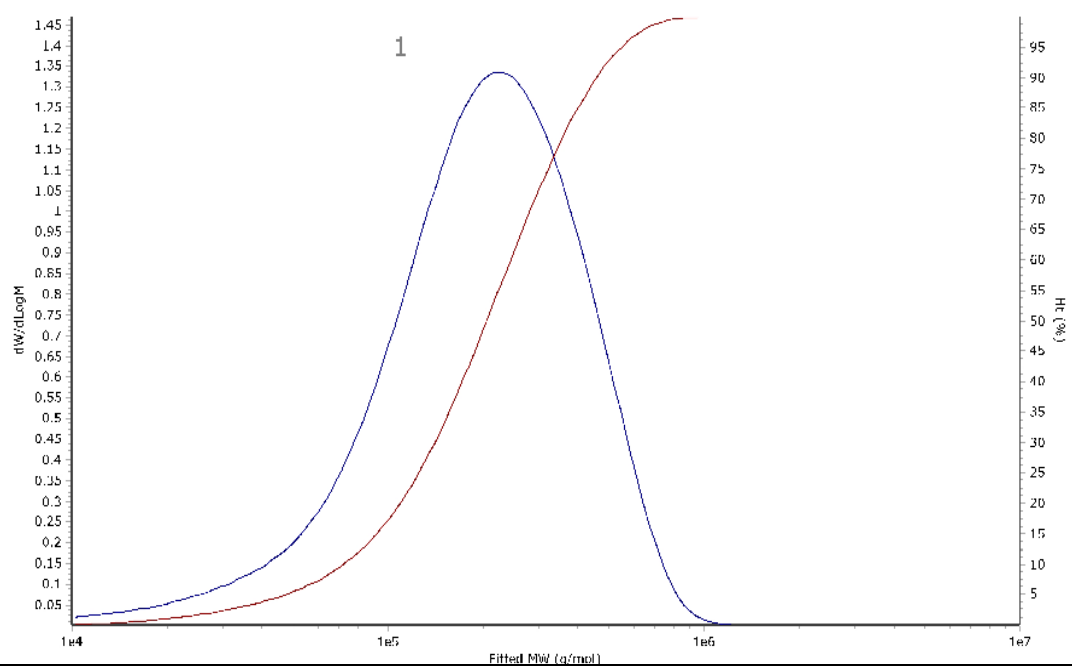

**Table 2 Run-10**

**Distribution Plot**

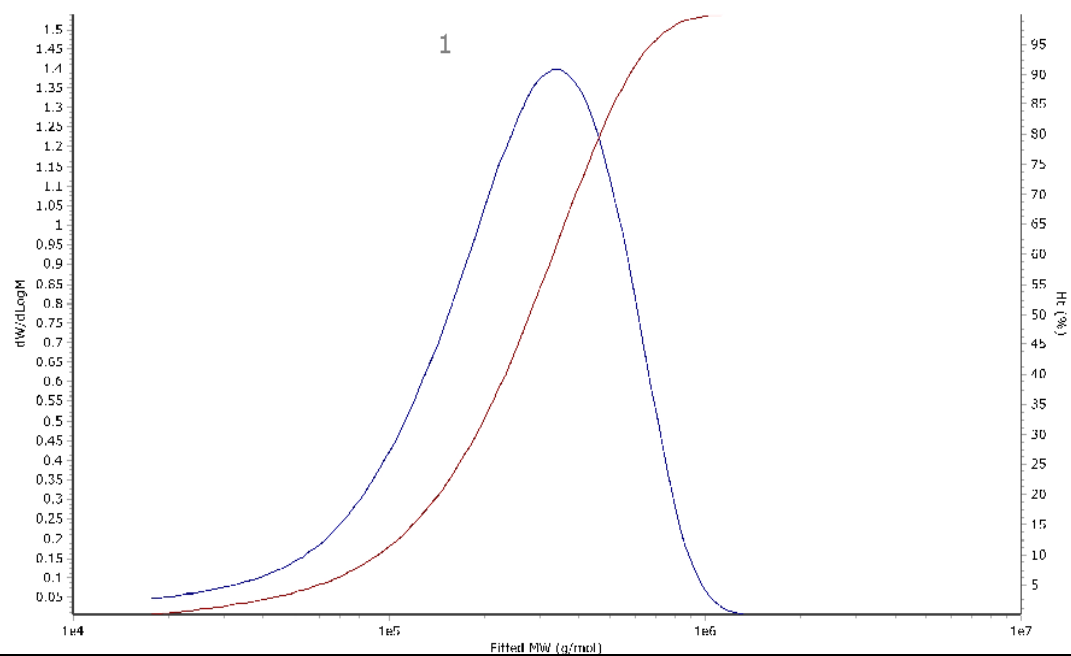

**Table 2 Run-11**

**Distribution Plot**

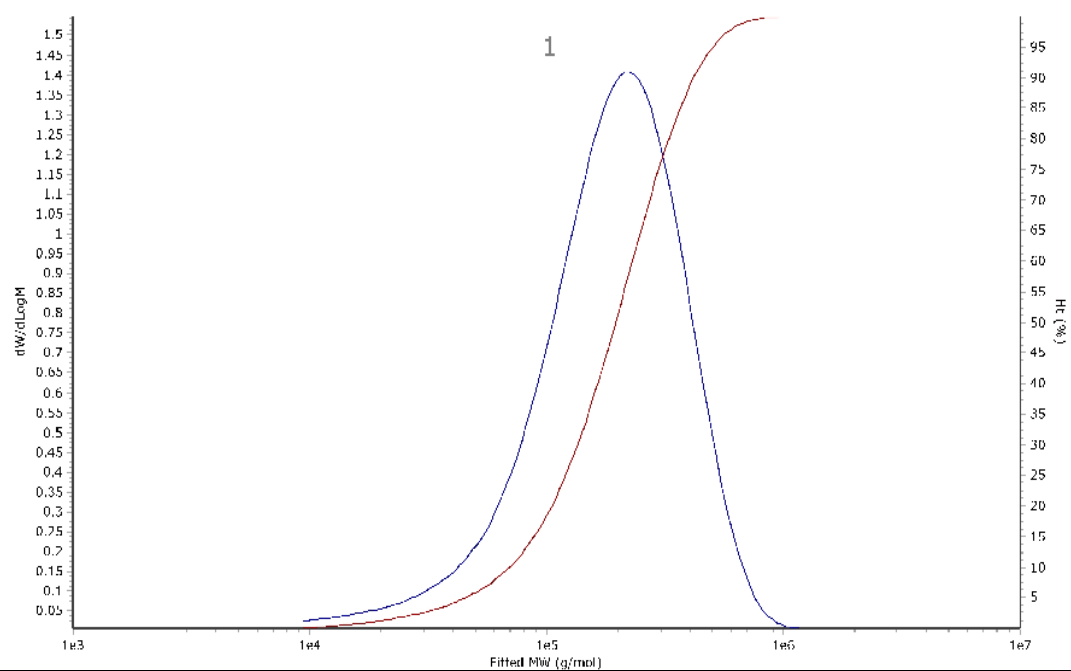

**Table 2 Run-12**

**Distribution Plot**

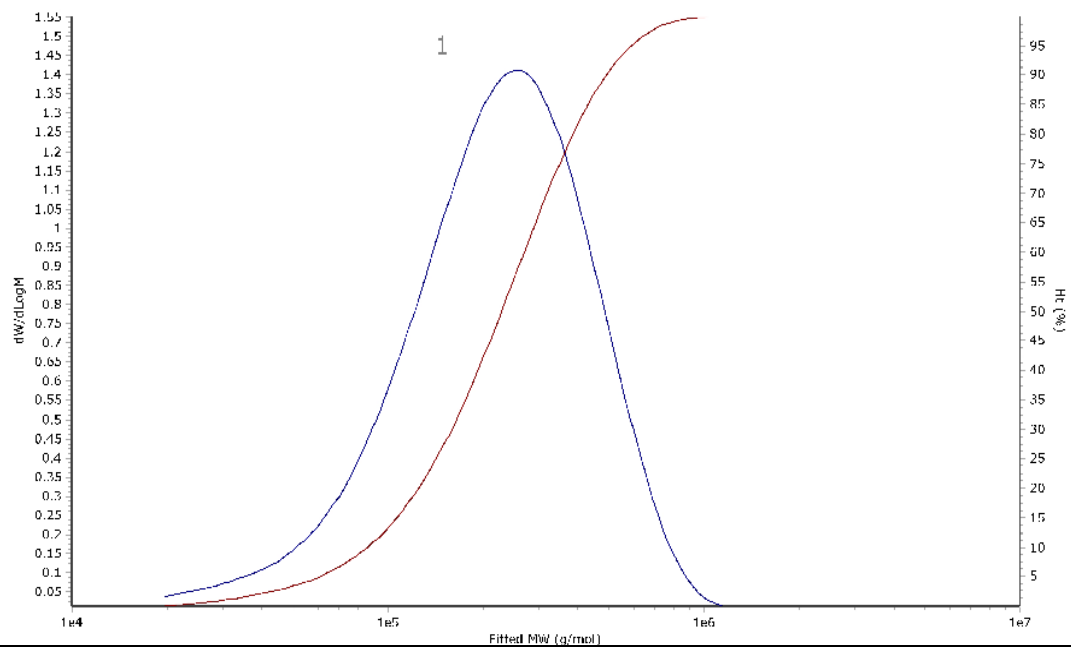

**Table 2 Run-13**

**Distribution Plot**

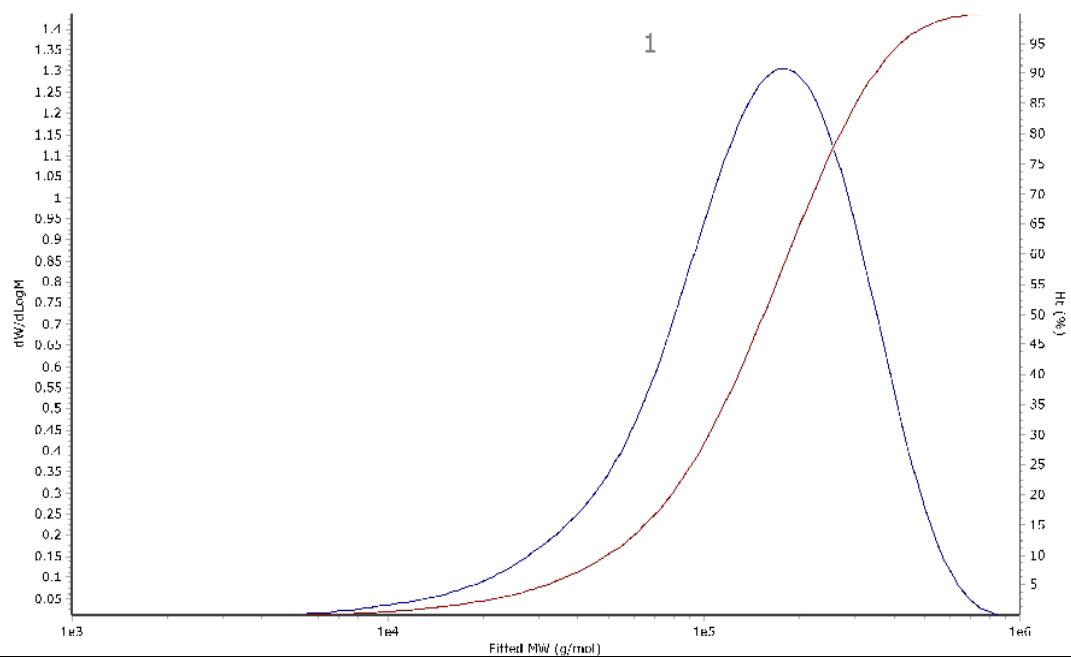



**Table 2 Run-14**

**Distribution Plot**

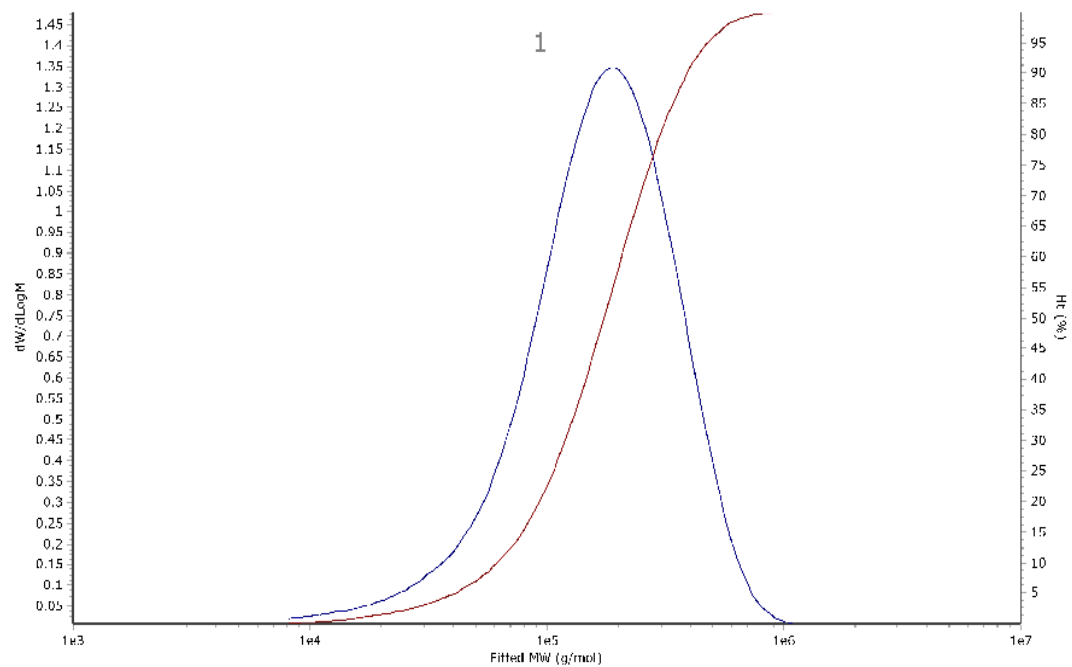

Supplement: s1 [file s1]
